# Supplementary material for: Targeting the NANOG/HDAC1 axis reverses resistance to PD-1 blockade by reinvigorating the antitumor immunity cycle
Source: PubMed Central journal article supplement (PMC8920337; doi:10.1172/jci147908), 2022-03-15
Supplement: jci-132-147908-s204.pdf [file jci-132-147908-s204.pdf]

**Supplemental information for the manuscript entitled:**

**Targeting NANOG/HDAC1 axis reverses resistance to PD-1 blockade by reinvigorating anti-tumor immunity cycle**

**Se Jin Oh. et al.,**

Supplemental Figure 1. Anti-tumor immune state signature could predict response to anti-PD-1 therapy.

Supplemental Figure 2. NANOG is inversely associated with anti-tumor immune state of the TME in melanoma patients treated with anti-PD-1.

Supplemental Figure 3. Diagram depicting the process of *in vivo* immune selection by anti-PD-1 therapy.

Supplemental Figure 4. Diagram depicting the schedule of *in vivo* treatment.

Supplemental Figure 5. YUMM2.1 P3 cells display the immune-refractory feature of the TME.

Supplemental Figure 6. MHC class I expression and CTL activation capacity of tumor cells are unaffected by immune selection.

Supplemental Figure 7. CT26 P3 cells are more resistant to lysis by antigen-specific CTLs or granzyme B compared with P0 cells.

Supplemental Figure 8. NANOG is overexpressed in YUMM2.1 P3 cells compared to YUMM2.1 P0 cells.

Supplemental Figure 9. Test of siRNA-targeting *Nanog* to investigate the role of NANOG in immunotherapeutic resistance.

Supplemental Figure 10. Diagram depicting the schedule of *in vivo* treatment.

Supplemental Figure 11. NANOG reduces response to anti-PD-1 therapy by inducing immuno-refractory state in the TME.

Supplemental Figure 12. Test of siRNA-targeting *Hdac1* to investigate the role of HDAC1 in immunotherapeutic resistance.

Supplemental Figure 13. Test of siRNA-targeting *Mcl1* to investigate the role of MCL1 in immunotherapeutic resistance.

Supplemental Figure 14. Diagram depicting the schedule of *in vivo* treatment.

Supplemental Figure 15. The NANOG/HDAC1 axis is conserved in YUMM2.1 P3 cells.

Supplemental Figure 16. HDAC1 inhibition by FK228 reduces expression of the effectors of ICB therapy-refractoriness induced by the NANOG axis in YUMM2.1 P3

Supplemental Figure 17. Diagram depicting the schedule of *in vivo* treatment.

Supplemental Figure 18. Targeting HDAC1 overcomes resistance to anti-PD-1 therapy in YUMM2.1 P3

Supplemental Figure 19. MYC and SOCS2 are inversely associated with immune-refractory feature of the TME in melanoma patients.

Supplemental Table 1. Differentially expressed genes between NANOG<sup>high</sup> and NANOG<sup>low</sup> patients.

## Supplemental Figures and Figure legends.

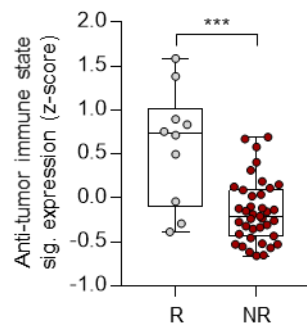

**Supplemental Figure 1. Anti-tumor immune state signature could predict response to anti-PD-1 therapy.** Comparisons of expression level of anti-tumor immune state signatures genes in responders (R,  $n = 10$ ), and non-responders (NR,  $n = 39$ ) to PD-1 blockade therapy. The p-values were determined by unpaired, two-tailed Student's t-test. In the box plots, the top and bottom edges of the boxes indicate the first and third quartiles, respectively; the center lines indicate the medians, and the ends of the whiskers indicate the maximum and minimum values. Source data are provided as a Source Data file. (\* $P \leq 0.05$ , \*\* $P \leq 0.01$ , \*\*\* $P \leq 0.001$ . NS, not significant)

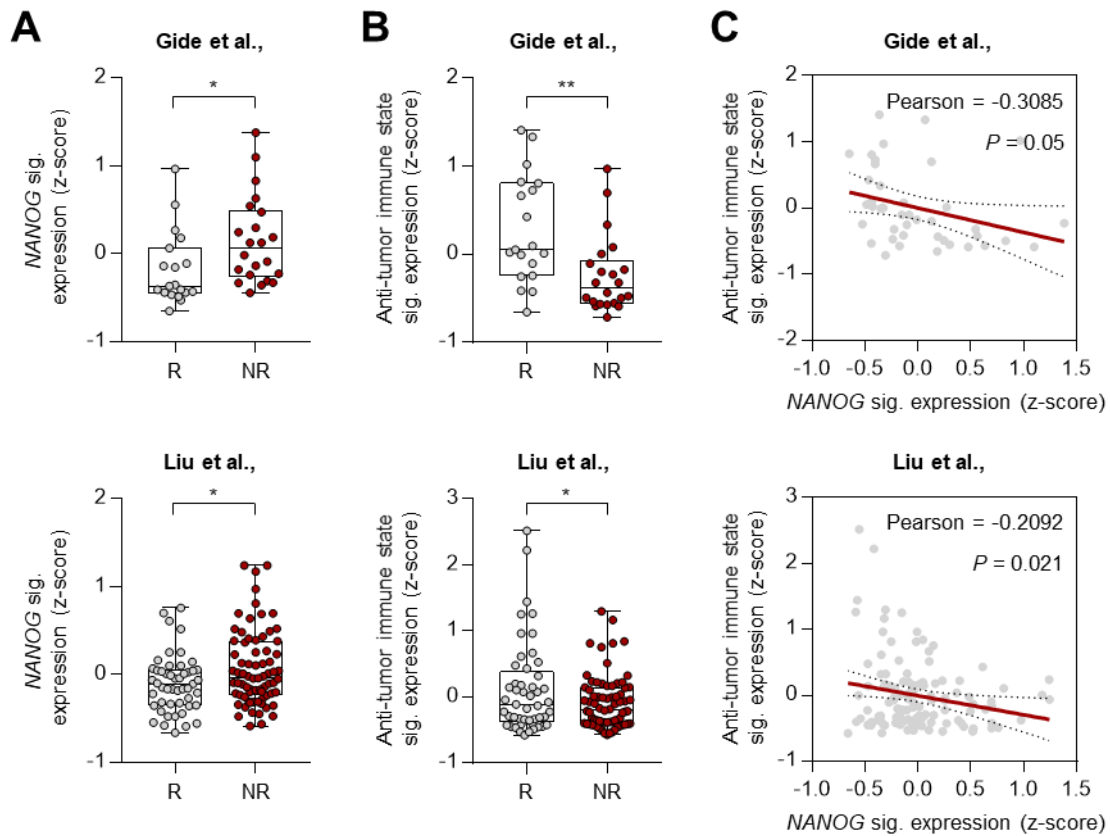

**Supplemental Figure 2. NANOG is inversely associated with anti-tumor immune state of the TME in melanoma patients treated with anti-PD-1. (A to C) Top, indicated signature expression or correlation of responder (R,  $n = 19$ ) and non-responders (NR,  $n = 22$ ) in Gide et al., cohort. Bottom, indicated signature expression or correlation of responder (R,  $n = 49$ ) and non-responders (NR,  $n = 73$ ) in Liu et al., cohort. (A and B) Comparisons of the expression levels of indicated signature. (C) Pearson's correlation between expression level of NANOG signature and anti-tumor immune states in melanoma patients treated with anti-PD-1. Correlation and two-tailed p-values were assessed using the Pearson's correlation coefficient and the unpaired t-test. The p-values were determined by unpaired, two-tailed Student's t-test. In the box plots, the top and bottom edges of boxes indicate the first and third quartiles, respectively; the center lines indicate the medians; and the ends of the whiskers indicate the maximum and minimum values, respectively. Source data are provided as a Source Data file. (\* $P \leq 0.05$ , \*\* $P \leq 0.01$ , \*\*\* $P \leq 0.001$ . NS, not significant).**

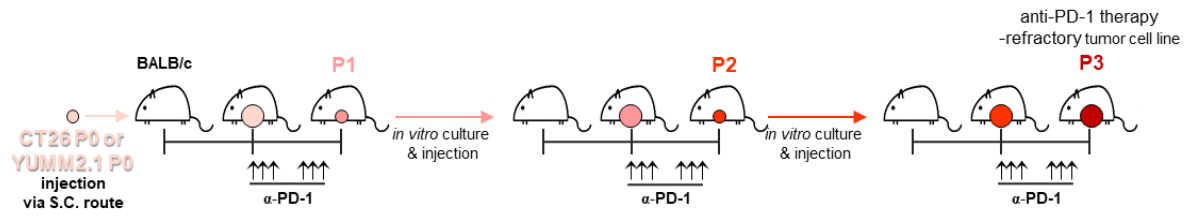

**Supplemental Figure 3. Diagram depicting the process of *in vivo* immune selection by anti-PD-1 therapy.** Refractory tumor model to anti-PD-1 therapy were generated from an anti-PD-1-susceptible parental cell line CT26 P0 or YUMM2.1 P0.

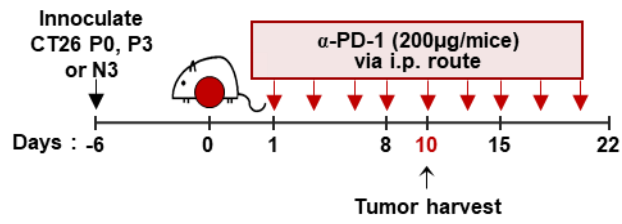

**Supplemental Figure 4. Diagram depicting the schedule of *in vivo* treatment.** Schematic of the therapy regiment in BALB/c mice implanted with CT26 P0, CT26 P3 or CT26 N3 cells were treated with indicated reagents.

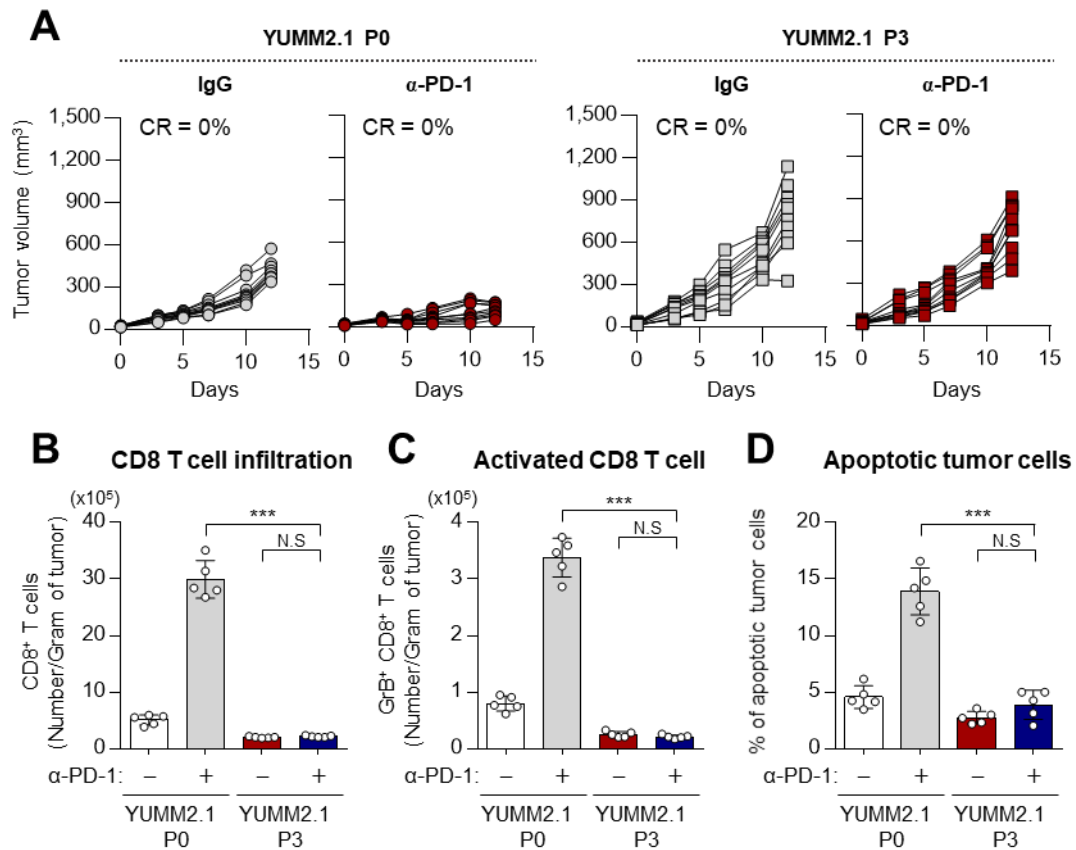

**Supplemental Figure 5. YUMM2.1 P3 cells display the immune-refractory feature of the TME. (A to D)** YUMM2.1 P0 or P3 tumor-bearing mice treated with IgG or PD-1 antibody. **(A)** Tumor growth curves. **(B)** Flow cytometry profiles of the tumor-infiltrating CD3<sup>+</sup> CD8<sup>+</sup> T cells. **(C)** The ratio of granzyme B<sup>+</sup> to tumor-infiltrating CD3<sup>+</sup> CD8<sup>+</sup> T cells. **(D)** The frequency of apoptotic cells in the tumors. Ten mice from each group were used for in vivo experiments. The graphs represent three independent experiments performed in triplicate. **(B to D)** The p-values by one-way ANOVA are indicated. The data represent the mean  $\pm$  SD. Source data are provided as a Source Data file. (\* $P \leq 0.05$ , \*\* $P \leq 0.01$ , \*\*\* $P \leq 0.001$ . NS, not significant)

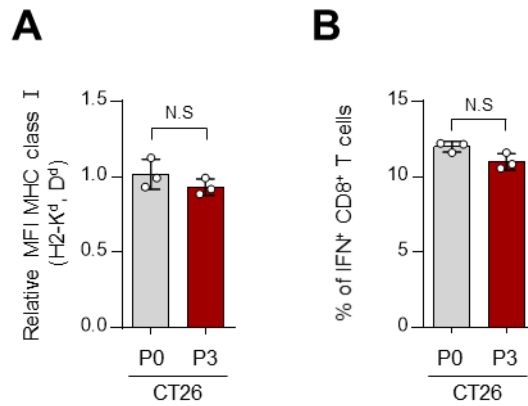

**Supplemental Figure 6. MHC class I expression and CTL activation capacity of tumor cells are unaffected by immune selection.** (A) MHC class I expression on CT26 P0 or P3 cells was measured by flow cytometry. (B) CT26 P0 or P3 cells were incubated with AH1-specific T cells at a 1:1 effector :

target ratio for 16 hours. The cells were then stained for surface CD8 and intracellular IFN- $\gamma$  to detect CTL activation. The graphs represent three independent experiments performed in triplicate. The p-values were determined by unpaired, two-tailed Student's t-test. The data represent the mean  $\pm$  SD. Source data are provided as a Source Data file.

(\*P  $\leq$  0.05, \*\*P  $\leq$  0.01, \*\*\*P  $\leq$  0.001. NS, not significant)



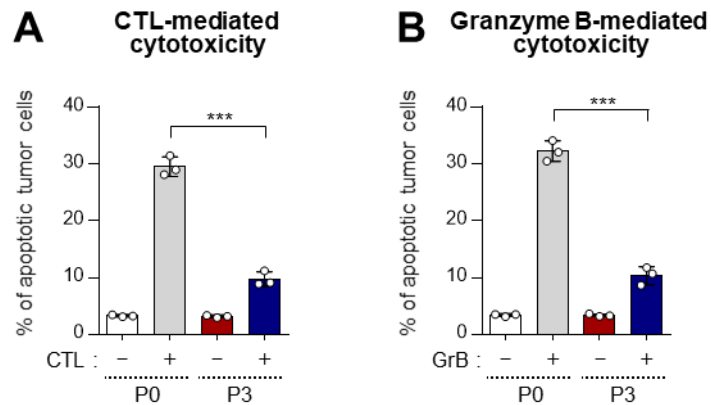

**Supplemental Figure 7. CT26 P3 cells are more resistant to lysis by antigen-specific CTLs or granzyme B compared with P0 cells.** (A) The frequency of apoptotic (active caspase-3+) cells in CT26 P0 or P3 cells after incubation with or without AH1-specific CTLs at a 1:1 ratio for 4 hours was estimated by flow cytometry analysis. (B) The frequency of apoptotic (active caspase-3+) cells in CT26 P0 or P3 cells after incubation with or without Granzyme B for 6 hours was analyzed by flow cytometry. The graphs represent three independent experiments performed in triplicate. The p-values by one-way ANOVA are indicated. The data represent the mean  $\pm$  SD. Source data are provided as a Source Data file. (\* $P \leq 0.05$ , \*\* $P \leq 0.01$ , \*\*\* $P \leq 0.001$ . NS, not significant)

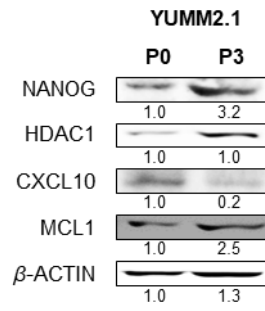

**Supplemental Figure 8. NANOG is overexpressed in YUMM2.1 P3 cells compared to YUMM2.1 P0 cells.** Western blot analysis of the expression of NANOG, HDAC1, CXCL10 and MCL1.  $\beta$ -actin was used as an internal loading control.

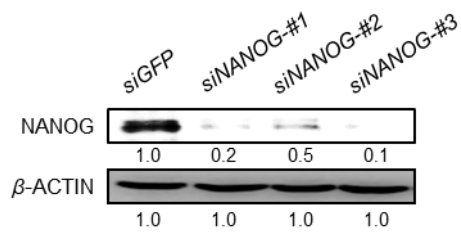

**Supplemental Figure 9. Test of siRNA-targeting *Nanog* to investigate the role of NANOG in immunotherapeutic resistance.** CT26 P3 cells were transfected with *siGFP* or *siNanog*-#1, -#2, -#3. Protein level of NANOG was analyzed by immunoblotting.  $\beta$ -ACTIN was included as an internal loading control. Numbers below blot images indicate the expression as measured by fold change.

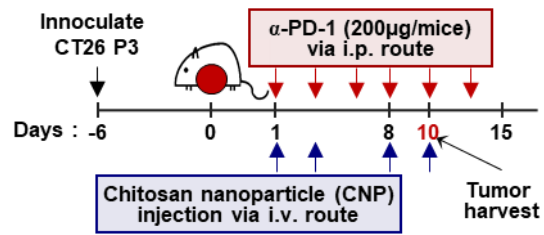

**Supplemental Figure 10. Diagram depicting the schedule of *in vivo* treatment.** Schematic of the therapy regiment in BALB/c mice implanted with CT26 P3 cells were treated with the indicated reagents.

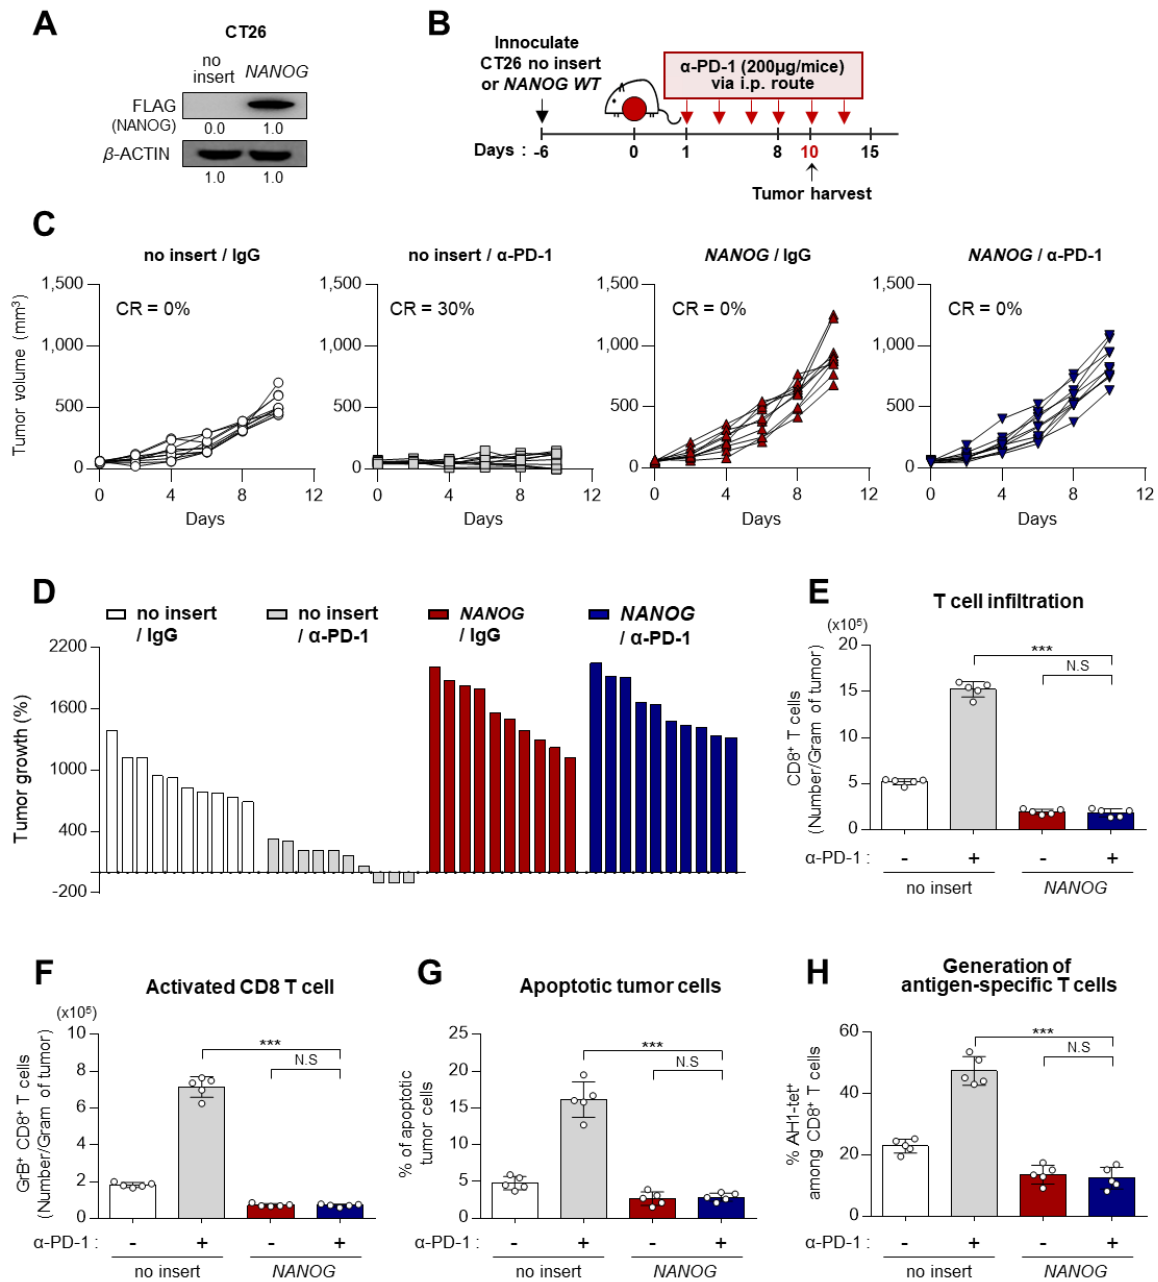

**Supplemental Figure 11. NANOG reduces response to anti-PD-1 therapy by inducing immunorefractory state in the TME.** (A) CT26 P0 cells were stably transfected with empty vector (no insert) or *Nanog*. Protein level of NANOG was analyzed by Western blot. (B) Schematic of the therapy regimen in BALB.c mice implanted with CT26 no insert or *Nanog* cells were treated with the indicated reagents. (C to H) CT26-no insert or CT26-*Nanog* tumor-bearing mice were treated with IgG or PD-1 antibody. (C) Tumor volume and (D) percentage of tumor growth at 17 days after challenge. (E) Flow cytometry profiles of tumor-infiltrating CD8<sup>+</sup> T cells. (F) The absolute number of GrB<sup>+</sup> tumor-infiltrating CD8<sup>+</sup> T cells. (G) The frequency of apoptotic cells in the tumors treated with the indicated reagents. (H)

The percentage of AH1-specific T cells (AH1-tetramer<sup>+</sup>) among CD8<sup>+</sup> T cells were analyzed by flow cytometry. Numbers below blots indicate the expression as measured by fold change. Ten mice from each group were used for in vivo experiments. The graphs represent three independent experiments performed in triplicate. (E to H) The p-values by one-way ANOVA are indicated. The data represent the mean  $\pm$  SD. Source data are provided as a Source Data file. (\*P  $\leq$  0.05, \*\*P  $\leq$  0.01, \*\*\*P  $\leq$  0.001. NS, not significant)

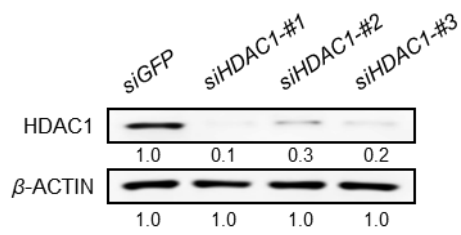

**Supplemental Figure 12. Test of siRNA-targeting *Hdac1* to investigate the role of HDAC1 in immunotherapeutic resistance.** CT26 P3 cells were transfected with *siGFP* or *siHdac1*-#1, -#2, -#3. Protein level of HDAC1 was analyzed by immunoblotting.  $\beta$ -ACTIN was included as an internal loading control. Numbers below blot images indicate the expression as measured by fold change.

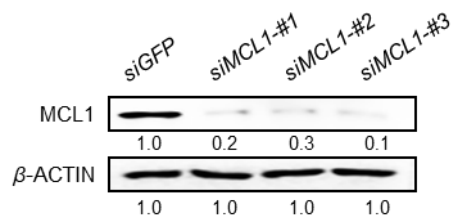

**Supplemental Figure 13. Test of siRNA-targeting *Mcl1* to investigate the role of MCL1 in immunotherapeutic resistance.** CT26 P3 cells were transfected with *siGFP* or *siMcl1*-#1, -#2, -#3. Protein level of MCL1 was analyzed by immunoblotting.  $\beta$ -ACTIN was included as an internal loading control. Numbers below blot images indicate the expression as measured by fold change.



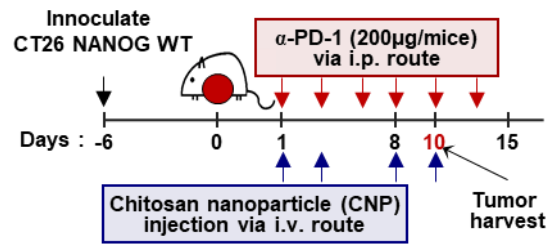

**Supplemental Figure 14. Diagram depicting the schedule of *in vivo* treatment.** Schematic of the therapy regimen in BALB/c mice implanted with CT26 NANOG WT cells were treated with the indicated reagents.

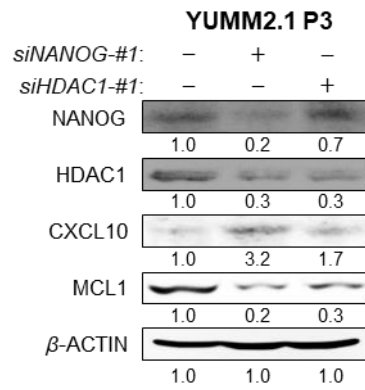

**Supplemental Figure 15. The NANOG/HDAC1 axis is conserved in YUMM2.1 P3 cells.** YUMM2.1 P3 cells were transfected with *siGFP*, *siNanog* or *siHdac1*. Western blot analysis of NANOG, HDAC1, CXCL10, and MCL1 expression.  $\beta$ -actin was used as an internal loading control. Numbers below blot images indicate the expression as measured by fold change.

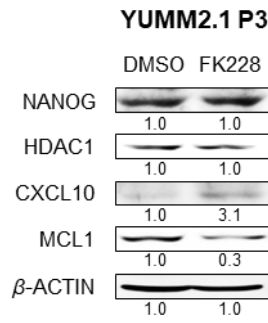

**Supplemental Figure 16. HDAC1 inhibition by FK228 reduces expression of the effectors of ICB therapy-refractoriness induced by the NANOG axis in YUMM2.1 P3.** YUMM2.1 P3 cells treated with FK228 or DMSO. Western blot analysis of NANOG, HDAC1, CXCL10, and MCL1 expression.  $\beta$ -actin was used as an internal loading control. Numbers below blot images indicate the expression as measured by fold change.

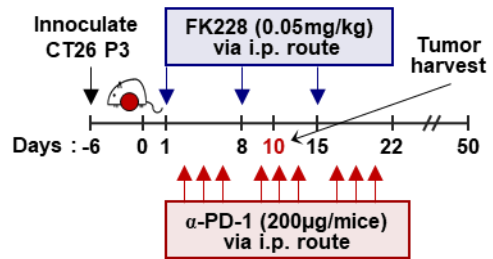

**Supplemental Figure 17. Diagram depicting the schedule of *in vivo* treatment.** Schematic of the therapy regimen in BALB/c mice implanted with CT26 P3 cells.

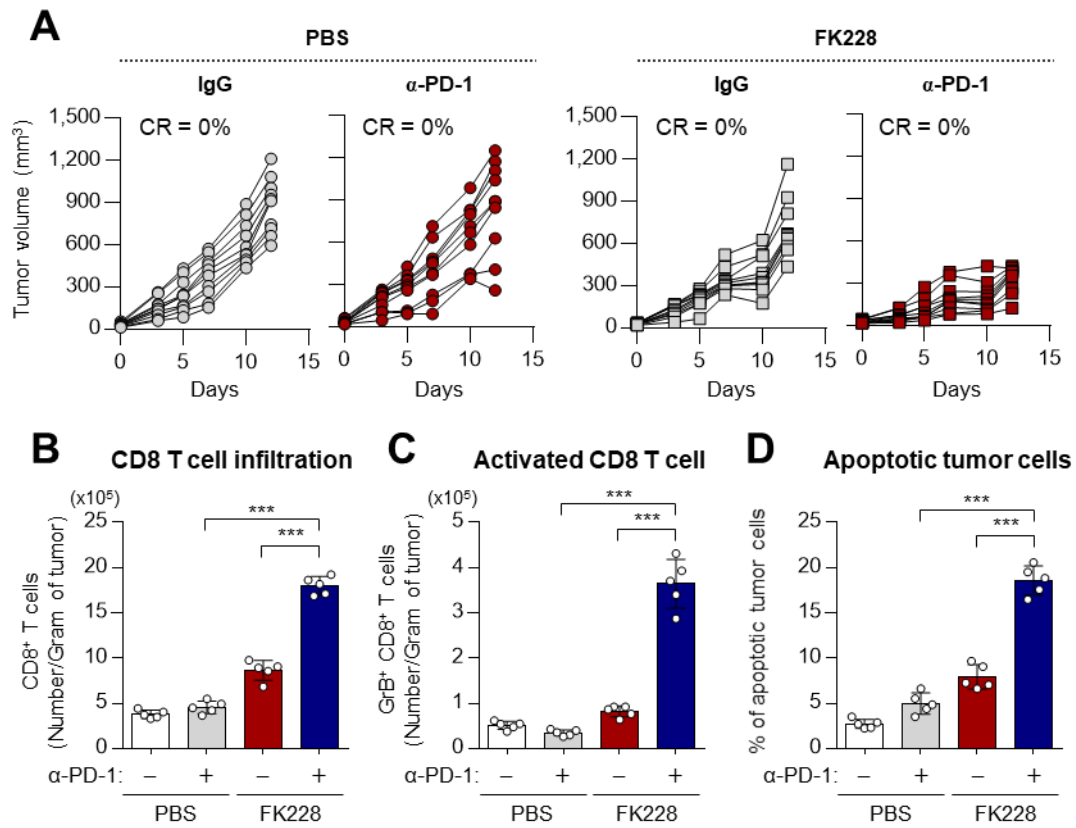

**Supplemental Figure 18. Targeting HDAC1 overcomes resistance to anti-PD-1 therapy in YUMM2.1 P3. (A to D)** YUMM2.1 P3 tumor-bearing mice administrated vehicle of FK228, with or without PD-1 antibody. **(A)** Tumor growth curves. **(B)** Flow cytometry profiles of tumor-infiltrating CD3<sup>+</sup> CD8<sup>+</sup> T cells. **(C)** The ratio of granzyme B<sup>+</sup> to tumor-infiltrating CD3<sup>+</sup> CD8<sup>+</sup> T cells. **(D)** The frequency of apoptotic cells in the tumors. Ten mice from each group were used for in vivo experiments. The graphs represent three independent experiments performed in triplicate. **(B to D)** The p-values by one-way ANOVA are indicated. The data represent the mean  $\pm$  SD. Source data are provided as a Source Data file. (\* $P \leq 0.05$ , \*\* $P \leq 0.01$ , \*\*\* $P \leq 0.001$ . NS, not significant)

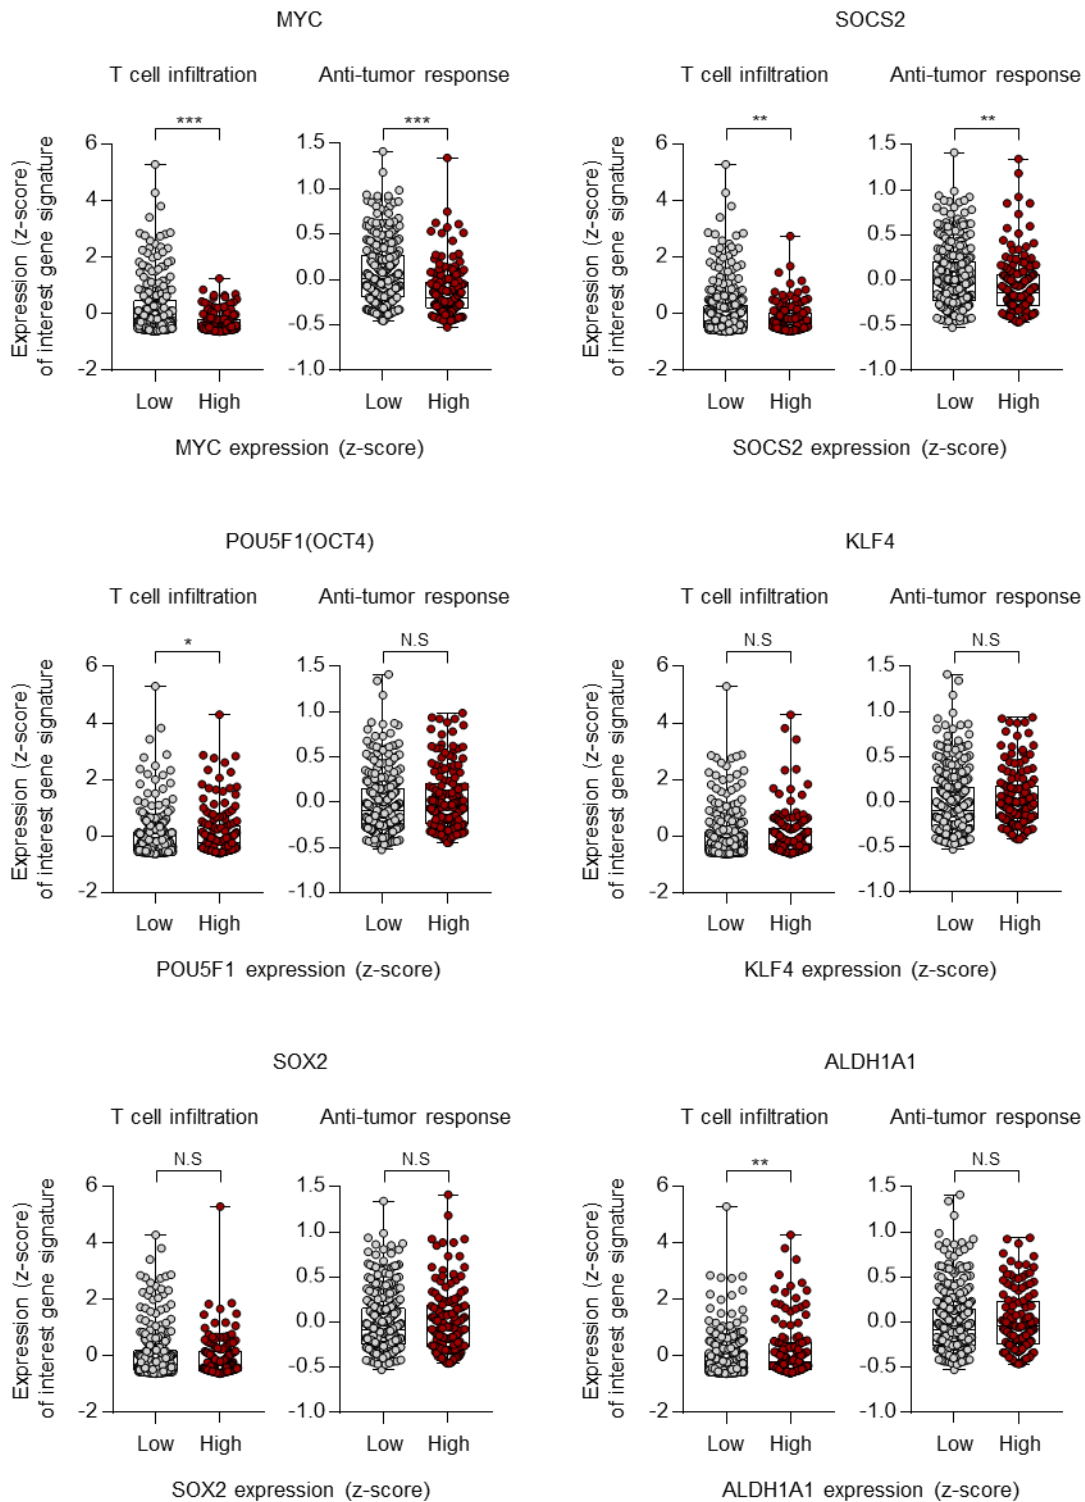

**Supplemental Figure 19. MYC and SOCS2 are inversely associated with immune-refractory feature of the TME in melanoma patients.** Comparisons of expression levels of T cell infiltration and anti-tumor response signatures in low levels and high levels of indicated genes. The 25th and 75th percentiles were used as cutoff thresholds. The p-values were determined by unpaired, two-tailed

Student's t-test. In the box plots, the top and bottom edges of boxes indicate the first and third quartiles, respectively; the center lines indicate the medians; and the ends of the whiskers indicate the maximum and minimum values, respectively. Source data are provided as a Source Data file. (\*P ≤ 0.05, \*\*P ≤ 0.01, \*\*\*P ≤ 0.001. NS, not significant)





**Supplemental Table 1. Differentially expressed genes between NANOG<sup>high</sup> and NANOG<sup>low</sup> patients.**

| Gene            | AveExpr     | logFC       | p value     | adj. p value |
|-----------------|-------------|-------------|-------------|--------------|
| FAT1 2195       | 4.302713349 | 1.209476824 | 1.16875E-23 | 2.35305E-19  |
| PPP4R1 9989     | 1.602767249 | 1.068143905 | 1.89407E-12 | 1.90666E-08  |
| ANKRD57 65124   | 1.839260911 | 1.109958    | 3.50392E-11 | 2.35148E-07  |
| RNF217 154214   | 2.086034504 | 1.219251444 | 3.29202E-10 | 1.65696E-06  |
| CSK 1445        | 0.619978689 | 0.94230173  | 1.37199E-09 | 5.2357E-06   |
| VRK3 51231      | 0.755125851 | 0.95812483  | 1.56033E-09 | 5.2357E-06   |
| PAR3 56288      | 1.683417381 | 1.08529568  | 2.18288E-09 | 6.27827E-06  |
| PSD3 23362      | 2.896094047 | 1.190925024 | 2.78468E-09 | 6.93998E-06  |
| RUNX3 864       | 0.477668685 | 0.907871606 | 3.44707E-09 | 6.93998E-06  |
| SH3D19 152503   | 2.026149312 | 1.116206449 | 3.30644E-09 | 6.93998E-06  |
| MANSC1 54682    | 2.28498751  | 1.157999227 | 4.4289E-09  | 8.10609E-06  |
| RBCK1 10616     | 0.697182502 | 0.954702728 | 6.86646E-09 | 1.15202E-05  |
| GAN 8139        | 1.961230094 | 1.189796425 | 7.91336E-09 | 1.22554E-05  |
| MIIP 60672      | 0.64712949  | 0.935764836 | 9.64391E-09 | 1.38686E-05  |
| TMCO4 255104    | 0.696694085 | 0.942458973 | 1.60798E-08 | 2.15823E-05  |
| SPESP1 246777   | 12.6214698  | 1.759516239 | 1.742E-08   | 2.19198E-05  |
| MAPK6 5597      | 1.609512208 | 1.071558852 | 1.86435E-08 | 2.20794E-05  |
| USP46 64854     | 1.503928213 | 1.06913879  | 2.6829E-08  | 2.94643E-05  |
| YWHAQ 10971     | 1.291643926 | 1.030174864 | 2.78061E-08 | 2.94643E-05  |
| MARVELD2 153562 | 4.877985544 | 1.730404013 | 3.15491E-08 | 3.17589E-05  |
| TMEM143 55260   | 0.626986273 | 0.912964048 | 3.53988E-08 | 3.39374E-05  |
| HMHA1 23526     | 0.432348063 | 0.889473649 | 3.87775E-08 | 3.54867E-05  |
| KLF10 7071      | 1.612144582 | 1.072241499 | 4.91797E-08 | 4.30493E-05  |
| PLEKHO2 80301   | 0.650805029 | 0.949099923 | 5.68928E-08 | 4.7726E-05   |
| TET2 54790      | 1.661778707 | 1.090198156 | 5.95035E-08 | 4.79194E-05  |
| AIP 9049        | 0.646405609 | 0.94334091  | 6.295E-08   | 4.87451E-05  |
| TUSC3 7991      | 2.036648031 | 1.109139146 | 6.68152E-08 | 4.98218E-05  |
| FBXO44 93611    | 0.649716104 | 0.935526802 | 7.1894E-08  | 5.16943E-05  |
| TMTC3 160418    | 1.600504797 | 1.081958719 | 7.87601E-08 | 5.46785E-05  |
| FBXO6 26270     | 0.552971482 | 0.906977419 | 8.36916E-08 | 5.4721E-05   |
| PERP 64065      | 8.197207725 | 1.305672876 | 8.42573E-08 | 5.4721E-05   |
| KLF5 688        | 4.957578933 | 1.337303516 | 8.78582E-08 | 5.47515E-05  |
| SH2B2 10603     | 0.485831073 | 0.847156019 | 8.97432E-08 | 5.47515E-05  |
| ZNF778 197320   | 1.500334971 | 1.095267286 | 9.62621E-08 | 5.70013E-05  |
| LCP2 3937       | 0.491033225 | 0.898207033 | 1.04573E-07 | 5.93101E-05  |
| PTPN18 26469    | 0.642515042 | 0.941973429 | 1.06053E-07 | 5.93101E-05  |
| C19orf66 55337  | 0.644451029 | 0.937719111 | 1.16272E-07 | 6.26959E-05  |
| LIMD2 80774     | 0.485211506 | 0.90781405  | 1.18335E-07 | 6.26959E-05  |
| CRTC2 200186    | 0.69894671  | 0.951721084 | 1.22384E-07 | 6.31786E-05  |
| BICD1 636       | 1.595567145 | 1.086314983 | 1.44196E-07 | 6.6508E-05   |
| EXPH5 23086     | 6.220536822 | 1.708198989 | 1.45351E-07 | 6.6508E-05   |
| ICAM3 3385      | 0.422044113 | 0.874910018 | 1.38426E-07 | 6.6508E-05   |
| NCF1 653361     | 0.244675332 | 0.778820709 | 1.34458E-07 | 6.6508E-05   |
| RHBDL2 54933    | 5.90609982  | 1.962915511 | 1.42724E-07 | 6.6508E-05   |
| LSM10 84967     | 0.746230354 | 0.957250965 | 1.57209E-07 | 6.93503E-05  |
| MPND 84954      | 0.617930654 | 0.926167298 | 1.6491E-07  | 6.93503E-05  |
| RAB20 55647     | 0.437325967 | 0.871801412 | 1.65341E-07 | 6.93503E-05  |

|                  |             |              |             |             |
|------------------|-------------|--------------|-------------|-------------|
| SLC20A2 6575     | 1.568307783 | 1.069635052  | 1.60899E-07 | 6.93503E-05 |
| APBA3 9546       | 0.701369446 | 0.941807732  | 1.75028E-07 | 7.04887E-05 |
| MBOAT2 129642    | 1.702176647 | 1.092295958  | 1.75058E-07 | 7.04887E-05 |
| NCF1C 654817     | 0.22611928  | 0.720694429  | 1.83463E-07 | 7.24247E-05 |
| UNC93B1 81622    | 0.543956423 | 0.913565279  | 1.89615E-07 | 7.34137E-05 |
| HSPA4L 22824     | 2.268074005 | 1.170183418  | 2.08201E-07 | 7.90888E-05 |
| FUCA1 2517       | 0.517209623 | 0.911239982  | 2.16093E-07 | 8.05665E-05 |
| GPR115 221393    | 80.24701011 | -27.25654475 | 2.46958E-07 | 9.03999E-05 |
| C12orf29 91298   | 1.446469913 | 1.06797829   | 2.7243E-07  | 9.14139E-05 |
| DSP 1832         | 26.49566193 | 1.54553027   | 2.62484E-07 | 9.14139E-05 |
| GMIP 51291       | 0.562006919 | 0.914811352  | 2.70329E-07 | 9.14139E-05 |
| OCEL1 79629      | 0.589305332 | 0.910687701  | 2.64449E-07 | 9.14139E-05 |
| STAT5A 6776      | 0.648549015 | 0.944912841  | 2.58372E-07 | 9.14139E-05 |
| PYCR2 29920      | 0.729754103 | 0.959759218  | 2.78267E-07 | 9.18417E-05 |
| AKR1A1 10327     | 0.66623391  | 0.948650097  | 3.03565E-07 | 9.78017E-05 |
| PVRIG 79037      | 0.321295302 | 0.789737084  | 3.06978E-07 | 9.78017E-05 |
| VSNL1 7447       | 25.85150985 | 3.044958856  | 3.10898E-07 | 9.78017E-05 |
| EBI3 10148       | 0.408236742 | 0.816212144  | 3.21715E-07 | 9.81378E-05 |
| VTA1 51534       | 1.374586491 | 1.048573209  | 3.17984E-07 | 9.81378E-05 |
| ARHGEF1 9138     | 0.667773397 | 0.950867811  | 3.39104E-07 | 0.0001004   |
| HCST1 10870      | 0.359292465 | 0.834270241  | 3.37042E-07 | 0.0001004   |
| BZW1 9689        | 1.369052669 | 1.040016116  | 3.636E-07   | 0.000102319 |
| GSTM4 2948       | 0.57586133  | 0.923963281  | 3.68633E-07 | 0.000102319 |
| LOC728743 728743 | 0.593422018 | 0.909443263  | 3.70996E-07 | 0.000102319 |
| SEPT10 151011    | 1.452729789 | 1.055447681  | 3.66466E-07 | 0.000102319 |
| UBE2E3 10477     | 1.479998231 | 1.056796771  | 3.6537E-07  | 0.000102319 |
| APBB2 323        | 1.831152343 | 1.098868162  | 3.85814E-07 | 0.000104289 |
| KCTD10 83892     | 1.263167547 | 1.032409082  | 3.88501E-07 | 0.000104289 |
| HDAC2 3066       | 1.43430083  | 1.049476605  | 3.93941E-07 | 0.000104358 |
| TRAF2 7186       | 0.697650628 | 0.945921679  | 4.16173E-07 | 0.000108816 |
| APPL2 55198      | 1.442226188 | 1.05566722   | 4.34454E-07 | 0.000112139 |
| ANKRD58 347454   | 0.330695096 | 0.726174818  | 4.7375E-07  | 0.000114427 |
| DENND4B 9909     | 0.745250109 | 0.961464822  | 4.69396E-07 | 0.000114427 |
| IRF3 3661        | 0.718694557 | 0.954425099  | 4.7742E-07  | 0.000114427 |
| LRCH4 4034       | 0.696593966 | 0.953010329  | 4.72645E-07 | 0.000114427 |
| TMEM30A 55754    | 1.529076525 | 1.054753748  | 4.76035E-07 | 0.000114427 |
| TNFSF12 8742     | 0.552967068 | 0.916014317  | 4.52747E-07 | 0.000114427 |
| DCUN1D3 123879   | 1.469231408 | 1.079802518  | 5.07678E-07 | 0.000120248 |
| PTPN13 5783      | 1.932079055 | 1.101333151  | 5.17367E-07 | 0.000121118 |
| ANGPTL6 83854    | 0.390714574 | 0.720984297  | 5.3146E-07  | 0.000121136 |
| ASCC3 10973      | 1.501167155 | 1.061891736  | 5.28088E-07 | 0.000121136 |
| C17orf87 388325  | 0.330000007 | 0.739559632  | 5.35493E-07 | 0.000121136 |
| HECTD1 25831     | 1.4308548   | 1.046953103  | 5.45127E-07 | 0.000121945 |
| TPBG 7162        | 2.631352064 | 1.19283467   | 5.61018E-07 | 0.000124121 |
| DDIT4L 115265    | 8.997426738 | 1.635747748  | 6.07732E-07 | 0.000132994 |
| IPPK 64768       | 1.609686833 | 1.08488      | 6.19743E-07 | 0.000134164 |
| C19orf54 284325  | 0.744039046 | 0.95256023   | 6.75909E-07 | 0.000142529 |
| COL17A1 1308     | 76.46654656 | 2.290902104  | 6.87747E-07 | 0.000142529 |
| PNKD 25953       | 0.673450707 | 0.949121998  | 6.74304E-07 | 0.000142529 |
| TMEM149 79713    | 0.441559267 | 0.869509161  | 6.9378E-07  | 0.000142529 |
| ZNF672 79894     | 0.692811297 | 0.949949411  | 6.92592E-07 | 0.000142529 |
| HIGD2A 192286    | 0.569989355 | 0.927528526  | 7.04238E-07 | 0.000143216 |

|                 |             |             |             |             |
|-----------------|-------------|-------------|-------------|-------------|
| SIRPG 55423     | 0.291380236 | 0.776793043 | 7.1408E-07  | 0.000143766 |
| SH3RF2 153769   | 18.91025503 | 2.268822545 | 7.23657E-07 | 0.000144251 |
| SERPINB8 5271   | 1.920872933 | 1.117508384 | 7.31192E-07 | 0.000144324 |
| PSMB9 5698      | 0.478101906 | 0.900430043 | 7.53445E-07 | 0.000145029 |
| RASSF9 9182     | 3.506273677 | 1.771545718 | 7.56374E-07 | 0.000145029 |
| WAS 7454        | 0.367132979 | 0.846443341 | 7.50617E-07 | 0.000145029 |
| SIGLEC5 8778    | 0.376552504 | 0.767093648 | 7.65416E-07 | 0.000145378 |
| EXOC1 55763     | 1.335093878 | 1.044464029 | 7.81981E-07 | 0.000146403 |
| TAPBP 6892      | 0.614831993 | 0.947427814 | 7.90468E-07 | 0.000146403 |
| TFEB 7942       | 0.535736368 | 0.903567657 | 7.92625E-07 | 0.000146403 |
| TIFAB 497189    | 0.340387675 | 0.718434792 | 8.09877E-07 | 0.00014823  |
| ABHD14B 84836   | 0.616023377 | 0.939440741 | 8.71172E-07 | 0.000149909 |
| BST2 684        | 0.562152169 | 0.931975965 | 8.40299E-07 | 0.000149909 |
| CSDA 8531       | 1.551691783 | 1.055892552 | 8.70911E-07 | 0.000149909 |
| ING2 3622       | 1.364495899 | 1.063008684 | 8.57E-07    | 0.000149909 |
| METAP1 23173    | 1.316328571 | 1.0414956   | 8.53622E-07 | 0.000149909 |
| NFKB2 4791      | 0.639412017 | 0.940361511 | 8.64044E-07 | 0.000149909 |
| SH3BGR2 83699   | 2.06366049  | 1.159359168 | 8.48479E-07 | 0.000149909 |
| CNPY3 10695     | 0.6739549   | 0.950655213 | 8.83421E-07 | 0.000150167 |
| IL20RB 53833    | 18.43079111 | 2.122950449 | 9.02509E-07 | 0.000150167 |
| KLF8 11279      | 2.426993472 | 1.241582576 | 8.89097E-07 | 0.000150167 |
| ZNF229 7772     | 2.660953245 | 1.229045069 | 8.9918E-07  | 0.000150167 |
| BLVRB 645       | 0.603906323 | 0.931561142 | 9.55169E-07 | 0.000151857 |
| CD7 924         | 0.286612591 | 0.81030399  | 9.39227E-07 | 0.000151857 |
| CDS1 1040       | 4.414458131 | 1.467292105 | 9.23003E-07 | 0.000151857 |
| KLHDC5 57542    | 1.368535176 | 1.047914938 | 9.29417E-07 | 0.000151857 |
| NADK 65220      | 0.785825249 | 0.967327876 | 9.47155E-07 | 0.000151857 |
| RAB27B 5874     | 12.23835624 | 20.79996305 | 9.5792E-07  | 0.000151857 |
| ARL5A 26225     | 1.362275931 | 1.048100881 | 9.83635E-07 | 0.000152396 |
| C1orf106 55765  | 6.386659596 | 1.485261474 | 9.74375E-07 | 0.000152396 |
| IMPAD1 54928    | 1.479411479 | 1.050792392 | 9.84029E-07 | 0.000152396 |
| AATF 26574      | 0.760552861 | 0.964530578 | 1.04274E-06 | 0.000154363 |
| FAM160A1 729830 | 5.414637255 | 1.754129283 | 1.01327E-06 | 0.000154363 |
| METAP2 10988    | 1.332946854 | 1.039527652 | 1.03801E-06 | 0.000154363 |
| RAB4B 53916     | 0.638982295 | 0.933778855 | 1.03103E-06 | 0.000154363 |
| SPTLC3 55304    | 3.663457171 | 1.33809674  | 1.0414E-06  | 0.000154363 |
| ZBTB48 3104     | 0.756463987 | 0.954051275 | 1.04215E-06 | 0.000154363 |
| GALM 130589     | 0.584806072 | 0.918368292 | 1.12822E-06 | 0.000155135 |
| GFOD2 81577     | 1.32077276  | 1.044578667 | 1.08312E-06 | 0.000155135 |
| GNGT2 2793      | 0.428722696 | 0.780746238 | 1.12614E-06 | 0.000155135 |
| LRRC1 55227     | 1.815822594 | 1.108935489 | 1.13119E-06 | 0.000155135 |
| NDFIP2 54602    | 1.469063189 | 1.059489152 | 1.07888E-06 | 0.000155135 |
| PANK4 55229     | 0.76719012  | 0.959909146 | 1.11696E-06 | 0.000155135 |
| PAWR 5074       | 1.905999181 | 1.160788262 | 1.13271E-06 | 0.000155135 |
| PPP2CB 5516     | 1.346434011 | 1.041227114 | 1.09929E-06 | 0.000155135 |
| PRDM4 11108     | 1.27515246  | 1.037012066 | 1.12022E-06 | 0.000155135 |
| SDR42E1 93517   | 5.581728952 | 1.758980873 | 1.12512E-06 | 0.000155135 |
| ZNF662 389114   | 2.430281927 | 1.226203096 | 1.09539E-06 | 0.000155135 |
| TAZ 6901        | 0.731551799 | 0.9509504   | 1.14497E-06 | 0.000155755 |
| EGLN2 112398    | 0.771028985 | 0.966559241 | 1.17007E-06 | 0.000157204 |
| MTMR14 64419    | 0.764440012 | 0.962692031 | 1.17124E-06 | 0.000157204 |
| ITGAL 3683      | 0.310942745 | 0.841765717 | 1.1913E-06  | 0.000157792 |

|                |             |             |             |             |
|----------------|-------------|-------------|-------------|-------------|
| KIF5B 3799     | 1.44564616  | 1.047260831 | 1.18752E-06 | 0.000157792 |
| CD72 971       | 0.35260373  | 0.820498548 | 1.20483E-06 | 0.000158541 |
| GJA1 2697      | 5.431133635 | 1.270996062 | 1.22227E-06 | 0.000158761 |
| TMEM184C 55751 | 1.312281922 | 1.043638429 | 1.22082E-06 | 0.000158761 |
| ATMIN 23300    | 1.283857515 | 1.035590209 | 1.25639E-06 | 0.000159867 |
| IL2RG 3561     | 0.3198545   | 0.846780811 | 1.26828E-06 | 0.000159867 |
| PPM1M 132160   | 0.673010697 | 0.940160179 | 1.27049E-06 | 0.000159867 |
| PTPRCAP 5790   | 0.265411989 | 0.811738538 | 1.26209E-06 | 0.000159867 |
| ZDHHC18 84243  | 0.732279607 | 0.9554557   | 1.24763E-06 | 0.000159867 |
| C1orf66 51093  | 0.711723068 | 0.946782051 | 1.28888E-06 | 0.000160179 |
| MAD1L1 8379    | 0.46703115  | 0.905278236 | 1.28865E-06 | 0.000160179 |
| CXADR 1525     | 4.230301902 | 1.417671305 | 1.33018E-06 | 0.000164298 |
| SLC25A19 60386 | 0.708836024 | 0.943149907 | 1.3438E-06  | 0.000164968 |
| PTPN6 5777     | 0.356246992 | 0.86013367  | 1.3596E-06  | 0.000165895 |
| PDLIM5 10611   | 1.489102239 | 1.057855741 | 1.42022E-06 | 0.000172249 |
| KCNK1 3775     | 8.657766586 | 2.138599865 | 1.45707E-06 | 0.00017566  |
| ITGB7 3695     | 0.358854375 | 0.841754026 | 1.4695E-06  | 0.000175957 |
| SYNCRIP 10492  | 1.291168851 | 1.032330887 | 1.47701E-06 | 0.000175957 |
| MXD1 4084      | 1.692892487 | 1.097327327 | 1.48866E-06 | 0.000175987 |
| PRKCD 5580     | 0.759438536 | 0.964935218 | 1.49475E-06 | 0.000175987 |
| MAST3 23031    | 0.681948186 | 0.941343975 | 1.51693E-06 | 0.00017756  |
| DCPS 28960     | 0.694948018 | 0.947205554 | 1.55186E-06 | 0.000180571 |
| PDGFC 56034    | 3.290632744 | 1.257095427 | 1.56059E-06 | 0.000180571 |
| ADAM9 8754     | 1.951591    | 1.096848935 | 1.57217E-06 | 0.00018069  |
| CD300LF 146722 | 0.378506879 | 0.795201646 | 1.57957E-06 | 0.00018069  |
| FAM78A 286336  | 0.569747814 | 0.916473931 | 1.61401E-06 | 0.000183587 |
| C1QB 713       | 0.367898721 | 0.891261382 | 1.63602E-06 | 0.000185044 |
| CD27 939       | 0.26537638  | 0.803443239 | 1.64864E-06 | 0.00018543  |
| EPB41L4B 54566 | 4.735582354 | 1.578218179 | 1.68246E-06 | 0.000188183 |
| EPOR 2057      | 0.644351372 | 0.925021967 | 1.69969E-06 | 0.000189059 |
| SAFB2 9667     | 0.827692361 | 0.974729559 | 1.73006E-06 | 0.000189697 |
| SLA 6503       | 0.433366146 | 0.874192114 | 1.72658E-06 | 0.000189697 |
| THAP8 199745   | 0.694893784 | 0.934016135 | 1.73368E-06 | 0.000189697 |
| BRI3 25798     | 0.679948196 | 0.953323929 | 1.78036E-06 | 0.000193751 |
| NCF1B 654816   | 0.248424046 | 0.716843747 | 1.83483E-06 | 0.000198606 |
| ATP8B1 5205    | 2.162482826 | 1.176154575 | 1.94454E-06 | 0.000200766 |
| C17orf62 79415 | 0.702510155 | 0.953513646 | 1.91597E-06 | 0.000200766 |
| CHMP4C 92421   | 6.738710222 | 1.938042605 | 1.91014E-06 | 0.000200766 |
| DENND1C 79958  | 0.333304157 | 0.825114724 | 1.93748E-06 | 0.000200766 |
| DENND2C 163259 | 2.312198619 | 1.25233558  | 1.87225E-06 | 0.000200766 |
| FCER1G 2207    | 0.288956117 | 0.839387539 | 1.93399E-06 | 0.000200766 |
| FRMD6 122786   | 1.68986971  | 1.073417587 | 1.92884E-06 | 0.000200766 |
| SIPA1 6494     | 0.672360115 | 0.947924625 | 1.94127E-06 | 0.000200766 |
| UCP2 7351      | 0.387957623 | 0.882416022 | 1.88597E-06 | 0.000200766 |
| C1QA 712       | 0.372207575 | 0.891460592 | 2.02581E-06 | 0.00020639  |
| GNRHR 2798     | 1.919065136 | 1.993346054 | 2.02977E-06 | 0.00020639  |
| TACC2 10579    | 2.158862273 | 1.135848784 | 2.01349E-06 | 0.00020639  |
| AKR1C2 1646    | 7.350351503 | 1.761739721 | 2.07103E-06 | 0.000209528 |
| HLA-H 3136     | 0.537933296 | 0.928704006 | 2.08482E-06 | 0.000209868 |
| RARS2 57038    | 1.404867236 | 1.056284508 | 2.1287E-06  | 0.000212164 |
| ZNF185 7739    | 5.002869373 | 1.306539901 | 2.12205E-06 | 0.000212164 |
| CWH43 80157    | 86.50543572 | 10.10347178 | 2.15064E-06 | 0.000213294 |

|                 |             |              |             |             |
|-----------------|-------------|--------------|-------------|-------------|
| C1orf38 9473    | 0.562830262 | 0.918530059  | 2.16354E-06 | 0.000213523 |
| C1QC 714        | 0.40023533  | 0.898270405  | 2.25217E-06 | 0.000219312 |
| ECH1 1891       | 0.697477706 | 0.956381189  | 2.24708E-06 | 0.000219312 |
| LNX1 84708      | 1.890051096 | 1.171744363  | 2.25488E-06 | 0.000219312 |
| ANKRD56 345079  | 18.41167079 | -5.385139132 | 2.28412E-06 | 0.000221088 |
| CDK11B 984      | 0.780499017 | 0.965095909  | 2.33536E-06 | 0.00022125  |
| EPT1 85465      | 1.370551651 | 1.04731549   | 2.31154E-06 | 0.00022125  |
| GPR125 166647   | 1.43496614  | 1.053582157  | 2.33037E-06 | 0.00022125  |
| HK3 3101        | 0.410550669 | 0.841068818  | 2.32318E-06 | 0.00022125  |
| HLA-A 3105      | 0.556502086 | 0.947469086  | 2.34075E-06 | 0.00022125  |
| C18orf8 29919   | 0.803569178 | 0.965351955  | 2.41899E-06 | 0.000224431 |
| EPHB3 2049      | 2.239648526 | 1.133874151  | 2.40801E-06 | 0.000224431 |
| MYO6 4646       | 1.839382185 | 1.103712712  | 2.39766E-06 | 0.000224431 |
| P2RY11 5032     | 0.615606983 | 0.914410404  | 2.40938E-06 | 0.000224431 |
| CAMK2D 817      | 1.616312728 | 1.072753093  | 2.46406E-06 | 0.000227037 |
| DSG1 1828       | 139.2380553 | 2.778618085  | 2.46963E-06 | 0.000227037 |
| GRIP1 23426     | 3.688798416 | 1.3617959    | 2.4882E-06  | 0.000227704 |
| BCL2L2 599      | 1.358089685 | 1.04523099   | 2.5096E-06  | 0.000228142 |
| IL12RB1 3594    | 0.396803696 | 0.833508911  | 2.5266E-06  | 0.000228142 |
| SDR16C5 195814  | 43.98762773 | 3.877830643  | 2.52698E-06 | 0.000228142 |
| PHF1 5252       | 0.749207649 | 0.961668951  | 2.54036E-06 | 0.000228326 |
| ARID5A 10865    | 0.634504068 | 0.93386114   | 2.62833E-06 | 0.000233187 |
| BICD2 23299     | 1.481758555 | 1.056201048  | 2.63079E-06 | 0.000233187 |
| TMED10P1 286102 | 1.351778128 | 1.079544758  | 2.61707E-06 | 0.000233187 |
| XRCC1 7515      | 0.779014137 | 0.964862167  | 2.64077E-06 | 0.000233187 |
| NIPAL1 152519   | 3.409375838 | 1.645736208  | 2.65546E-06 | 0.00023346  |
| ANXA8L2 244     | 74.32767933 | 3.944547846  | 2.67682E-06 | 0.000234315 |
| ARFGEF1 10565   | 1.382036438 | 1.046829785  | 2.80595E-06 | 0.000238049 |
| DENND2D 79961   | 0.394025914 | 0.861530634  | 2.84783E-06 | 0.000238049 |
| ERI2 112479     | 1.337942087 | 1.055906271  | 2.78947E-06 | 0.000238049 |
| JAG1 182        | 2.137064738 | 1.110782642  | 2.79525E-06 | 0.000238049 |
| KIAA1919 91749  | 1.426555084 | 1.085145895  | 2.7572E-06  | 0.000238049 |
| LYL1 4066       | 0.468365572 | 0.861408537  | 2.86013E-06 | 0.000238049 |
| MRM1 79922      | 0.718434503 | 0.94059495   | 2.82821E-06 | 0.000238049 |
| SERPIN5 5268    | 154.7186892 | 3.568106624  | 2.78705E-06 | 0.000238049 |
| SMAD1 4086      | 1.862904488 | 1.118918039  | 2.73134E-06 | 0.000238049 |
| TREX1 11277     | 0.61624545  | 0.924735029  | 2.87318E-06 | 0.000238049 |
| UBA6 55236      | 1.419288515 | 1.053958631  | 2.75323E-06 | 0.000238049 |
| VPS16 64601     | 0.751274658 | 0.961129346  | 2.8489E-06  | 0.000238049 |
| ZNF268 10795    | 1.495284587 | 1.074897548  | 2.87118E-06 | 0.000238049 |
| ACBD4 79777     | 0.670859184 | 0.928154157  | 2.90901E-06 | 0.000240029 |
| PSMB10 5699     | 0.580322778 | 0.929278053  | 2.94007E-06 | 0.000241602 |
| PAFAH1B1 5048   | 1.250550056 | 1.028444799  | 2.99756E-06 | 0.000244028 |
| S100A16 140576  | 3.161064988 | 1.152966123  | 3.00596E-06 | 0.000244028 |
| TMEM150A 129303 | 0.734600285 | 0.950643544  | 2.98738E-06 | 0.000244028 |
| FAM110C 642273  | 35.9637957  | -1.629393377 | 3.12053E-06 | 0.000252102 |
| MPP7 143098     | 5.146669173 | 1.576425856  | 3.13045E-06 | 0.000252102 |
| TSPYL4 23270    | 1.427816841 | 1.058498293  | 3.14493E-06 | 0.000252258 |
| CUTA1 51596     | 0.642453143 | 0.948508729  | 3.16165E-06 | 0.000252396 |
| PVRL4 81607     | 15.21239755 | 1.888388255  | 3.20015E-06 | 0.000252396 |
| SLA2 84174      | 0.353730949 | 0.798600832  | 3.20933E-06 | 0.000252396 |
| THAP3 90326     | 0.684441473 | 0.938930192  | 3.17999E-06 | 0.000252396 |

|                    |             |             |             |             |
|--------------------|-------------|-------------|-------------|-------------|
| UBXN11 91544       | 0.678587754 | 0.938793484 | 3.20025E-06 | 0.000252396 |
| ABI3 51225         | 0.42805462  | 0.861972687 | 3.29372E-06 | 0.000255184 |
| PRR13 54458        | 0.761658586 | 0.965012206 | 3.29548E-06 | 0.000255184 |
| RILPL2 196383      | 0.656619301 | 0.928485269 | 3.26575E-06 | 0.000255184 |
| STK38L 23012       | 1.519687734 | 1.069639974 | 3.28224E-06 | 0.000255184 |
| DNAJC5B 85479      | 0.311650868 | 0.666074161 | 3.33252E-06 | 0.000256083 |
| FAM168B 130074     | 1.254509807 | 1.028566785 | 3.3226E-06  | 0.000256083 |
| FAM83B 222584      | 94.10363639 | -11.3375574 | 3.36067E-06 | 0.000257264 |
| SMARCAD1 56916     | 1.575392977 | 1.069231783 | 3.38582E-06 | 0.000258207 |
| RAET1E 135250      | 24.61385544 | 5.559032648 | 3.42636E-06 | 0.000259334 |
| TOR2A 27433        | 0.662243037 | 0.931597969 | 3.41686E-06 | 0.000259334 |
| MYO1G 64005        | 0.382895806 | 0.84791176  | 3.46654E-06 | 0.000261392 |
| MAST4 375449       | 2.311648836 | 1.17786031  | 3.49698E-06 | 0.000262704 |
| C19orf38 255809    | 0.365417397 | 0.767610789 | 3.53403E-06 | 0.000263963 |
| MAD2L2 10459       | 0.686356588 | 0.947833252 | 3.55804E-06 | 0.000263963 |
| TMEM181 57583      | 1.486773402 | 1.058492577 | 3.54245E-06 | 0.000263963 |
| TPRA1 131601       | 0.685769789 | 0.946409195 | 3.56619E-06 | 0.000263963 |
| S1PR4 8698         | 0.31969173  | 0.782214942 | 3.63483E-06 | 0.000268058 |
| TRAPPC6A 79090     | 0.59330789  | 0.917946686 | 3.68823E-06 | 0.000271004 |
| ANXA8 653145       | 59.0348989  | 2.644088244 | 3.71742E-06 | 0.000272155 |
| TNKS1BP1 85456     | 1.603557286 | 1.061254698 | 3.77794E-06 | 0.000275584 |
| CTSH 1512          | 0.582039335 | 0.934803329 | 3.855E-06   | 0.000280191 |
| SIGLEC14 100049587 | 0.398053689 | 0.805815316 | 3.88757E-06 | 0.000281541 |
| STAT5B 6777        | 0.781446319 | 0.967520161 | 3.98248E-06 | 0.000287381 |
| VEZT 55591         | 1.351069889 | 1.048030059 | 4.02326E-06 | 0.000289287 |
| CHD9 80205         | 1.456036545 | 1.056343662 | 4.04337E-06 | 0.000289485 |
| PITPNM3 83394      | 3.701431911 | 1.380229051 | 4.05478E-06 | 0.000289485 |
| IDE 3416           | 1.634480565 | 1.085280119 | 4.09452E-06 | 0.000290827 |
| SEC24B 10427       | 1.336939105 | 1.043600853 | 4.10701E-06 | 0.000290827 |
| SLAMF8 56833       | 0.430360803 | 0.879562676 | 4.13843E-06 | 0.000290827 |
| SOX7 83595         | 3.206063236 | 1.266424996 | 4.12585E-06 | 0.000290827 |
| ZNF770 54989       | 1.446683557 | 1.057260055 | 4.1458E-06  | 0.000290827 |
| CORO1A 11151       | 0.318552917 | 0.861632912 | 4.17955E-06 | 0.000292177 |
| MAL2 114569        | 13.56716048 | 1.757965114 | 4.2232E-06  | 0.000293192 |
| SIT1 27240         | 0.265799935 | 0.758609768 | 4.21062E-06 | 0.000293192 |
| PLA2G2D 26279      | 0.163832438 | 0.734432755 | 4.34623E-06 | 0.000300696 |
| PSMF1 9491         | 0.793856933 | 0.972119759 | 4.36962E-06 | 0.000301279 |
| AKNA 80709         | 0.440332598 | 0.890044021 | 4.49862E-06 | 0.000303364 |
| CAPNS2 84290       | 62.77582077 | 5.680991107 | 4.44465E-06 | 0.000303364 |
| CCDC22 28952       | 0.741197356 | 0.955493911 | 4.5204E-06  | 0.000303364 |
| CKAP4 10970        | 1.523476431 | 1.054439111 | 4.47713E-06 | 0.000303364 |
| DHX32 55760        | 1.298602203 | 1.040942033 | 4.50847E-06 | 0.000303364 |
| RNF130 55819       | 0.748282136 | 0.962109017 | 4.43469E-06 | 0.000303364 |
| SHISA5 51246       | 0.758540882 | 0.968046234 | 4.46846E-06 | 0.000303364 |
| STAU2 27067        | 1.347601931 | 1.047964462 | 4.45135E-06 | 0.000303364 |
| GSTK1 373156       | 0.693712505 | 0.955750186 | 4.54067E-06 | 0.000303712 |
| CXCR2 3579         | 5.122122229 | 1.852309053 | 4.62046E-06 | 0.000305999 |
| LRRC23 10233       | 0.707451173 | 0.937963252 | 4.61812E-06 | 0.000305999 |
| NCKAP1 10787       | 1.358690028 | 1.038601195 | 4.6003E-06  | 0.000305999 |
| HS1BP3 64342       | 0.703976614 | 0.951685601 | 4.69548E-06 | 0.000308935 |
| RHEBL1 121268      | 0.678108003 | 0.91469885  | 4.69303E-06 | 0.000308935 |
| DHX58 79132        | 0.632368989 | 0.926896786 | 4.80126E-06 | 0.000314865 |

|                  |             |             |             |             |
|------------------|-------------|-------------|-------------|-------------|
| CD40 958         | 0.488973273 | 0.887751587 | 4.86071E-06 | 0.000317133 |
| FMNL1 752        | 0.438891362 | 0.884998312 | 4.86734E-06 | 0.000317133 |
| TACSTD2 4070     | 28.91276437 | 1.880673565 | 4.91477E-06 | 0.000319191 |
| CD247 919        | 0.323740105 | 0.803619546 | 5.00862E-06 | 0.00032424  |
| ATP6V1F 9296     | 0.621028667 | 0.944643481 | 5.09049E-06 | 0.000328484 |
| DENR 8562        | 1.282119023 | 1.035236031 | 5.12894E-06 | 0.000328772 |
| EDEM2 55741      | 0.768479095 | 0.962507502 | 5.20927E-06 | 0.000328772 |
| NCKAP1L 3071     | 0.442024887 | 0.882328047 | 5.20336E-06 | 0.000328772 |
| SLAMF6 114836    | 0.311492803 | 0.802560426 | 5.18705E-06 | 0.000328772 |
| TRIM6 117854     | 1.912499148 | 1.140458162 | 5.17566E-06 | 0.000328772 |
| TYK2 7297        | 0.788437925 | 0.968839419 | 5.20032E-06 | 0.000328772 |
| ZNF323 64288     | 1.690385042 | 1.129480675 | 5.14728E-06 | 0.000328772 |
| CDK2AP2 10263    | 0.575272088 | 0.926319794 | 5.29722E-06 | 0.000332245 |
| GRHL1 29841      | 12.81402732 | 1.83511991  | 5.29731E-06 | 0.000332245 |
| ICAM1 3383       | 0.602126675 | 0.942594762 | 5.32777E-06 | 0.000333118 |
| RANGRF 29098     | 0.72525397  | 0.951367124 | 5.38912E-06 | 0.000335911 |
| TSPAN33 340348   | 0.608480945 | 0.925278305 | 5.4537E-06  | 0.000338887 |
| MAP4K5 11183     | 1.469435622 | 1.059901775 | 5.51622E-06 | 0.000341717 |
| PTPN11 5781      | 1.330802625 | 1.037053396 | 5.55966E-06 | 0.000343352 |
| SEPT1 1731       | 0.289172116 | 0.805886687 | 5.62461E-06 | 0.0003463   |
| MICALCL 84953    | 8.219641344 | 3.072941746 | 5.64691E-06 | 0.000346614 |
| CD53 963         | 0.392476879 | 0.87472763  | 5.72851E-06 | 0.000350554 |
| ARHGAP32 9743    | 1.627103748 | 1.076576175 | 5.78044E-06 | 0.000352659 |
| CAPZB 832        | 0.79055907  | 0.973097504 | 5.82508E-06 | 0.000352716 |
| HAX1 10456       | 0.730548973 | 0.960036594 | 5.82553E-06 | 0.000352716 |
| LAPTM5 7805      | 0.460035248 | 0.912830962 | 5.83393E-06 | 0.000352716 |
| LCK 3932         | 0.314320961 | 0.823229615 | 5.8788E-06  | 0.000354365 |
| LRP6 4040        | 1.503275638 | 1.060681199 | 5.94567E-06 | 0.000355205 |
| MAP3K7 6885      | 1.480864565 | 1.063284986 | 5.9436E-06  | 0.000355205 |
| VAV1 7409        | 0.384469417 | 0.844373269 | 5.92081E-06 | 0.000355205 |
| TCF7L2 6934      | 1.367314916 | 1.053188583 | 6.01079E-06 | 0.000358033 |
| PDCD1 5133       | 0.276280104 | 0.77494491  | 6.05707E-06 | 0.000359726 |
| MAP4K1 11184     | 0.410616959 | 0.860505249 | 6.14291E-06 | 0.00036144  |
| SCEL 8796        | 18.80432336 | 2.280674677 | 6.14089E-06 | 0.00036144  |
| TMEM184A 202915  | 26.83444839 | 2.788566699 | 6.13441E-06 | 0.00036144  |
| ZNF750 79755     | 69.95448293 | 3.687260012 | 6.15774E-06 | 0.00036144  |
| PYGO2 90780      | 0.75111863  | 0.962229302 | 6.2263E-06  | 0.000364401 |
| SLC10A6 345274   | 8.122665014 | 3.703849664 | 6.30475E-06 | 0.000367923 |
| POLR3B 55703     | 1.298503023 | 1.047705709 | 6.33759E-06 | 0.000368771 |
| DNPEP 23549      | 0.772873775 | 0.965349752 | 6.36548E-06 | 0.000369326 |
| MAN2B1 4125      | 0.643775586 | 0.950221677 | 6.46838E-06 | 0.000372717 |
| RBM10 8241       | 0.822858156 | 0.97453595  | 6.48566E-06 | 0.000372717 |
| SETD8 387893     | 1.233136737 | 1.032141198 | 6.49797E-06 | 0.000372717 |
| TBX21 30009      | 0.356040181 | 0.770558061 | 6.45357E-06 | 0.000372717 |
| GRK6 2870        | 0.644146758 | 0.941257033 | 6.54136E-06 | 0.00037414  |
| SMAGP 57228      | 3.503940244 | 1.308199413 | 6.6033E-06  | 0.000376613 |
| DNASE2 1777      | 0.725484403 | 0.958531967 | 6.68828E-06 | 0.000380381 |
| CD6 923          | 0.34756437  | 0.830717213 | 6.82138E-06 | 0.000386859 |
| ERLIN2 11160     | 1.394261667 | 1.047741921 | 6.8633E-06  | 0.000387056 |
| RPL23AP53 644128 | 1.454315207 | 1.073477709 | 6.85507E-06 | 0.000387056 |
| TRPM6 140803     | 3.688031213 | 1.518212317 | 6.98064E-06 | 0.000392573 |
| IL1F5 26525      | 98.9339957  | 5.037025266 | 7.00325E-06 | 0.00039268  |

|                |             |              |             |             |
|----------------|-------------|--------------|-------------|-------------|
| MUTYH 4595     | 0.721639746 | 0.944044975  | 7.02155E-06 | 0.00039268  |
| RAVER1 125950  | 0.741099975 | 0.962133983  | 7.04476E-06 | 0.000392887 |
| FAM179B 23116  | 1.394845159 | 1.05808553   | 7.06776E-06 | 0.000393081 |
| ANKRD50 57182  | 1.613387299 | 1.070132901  | 7.18726E-06 | 0.000396441 |
| GPR87 53836    | 113.5654337 | -16.56996357 | 7.15442E-06 | 0.000396441 |
| TPM1 7168      | 1.706001187 | 1.077006926  | 7.18315E-06 | 0.000396441 |
| IFI35 3430     | 0.588391363 | 0.927305212  | 7.20794E-06 | 0.000396496 |
| CLCA2 9635     | 101.4486133 | 2.817164811  | 7.27261E-06 | 0.000397879 |
| VAMP5 10791    | 0.555670211 | 0.919252041  | 7.27078E-06 | 0.000397879 |
| BATF1 10538    | 0.521340045 | 0.885278375  | 7.31358E-06 | 0.000399036 |
| SEC63 11231    | 1.323287814 | 1.037463713  | 7.34042E-06 | 0.000399418 |
| IL22RA1 58985  | 7.68845211  | 1.72042331   | 7.42607E-06 | 0.000402989 |
| SGCB 6443      | 1.606328499 | 1.072988688  | 7.48118E-06 | 0.000404889 |
| BNIP3L 665     | 1.372422117 | 1.042077844  | 7.58898E-06 | 0.000407205 |
| DSC3 1825      | 118.7620918 | 2.672145448  | 7.56194E-06 | 0.000407205 |
| SPOCK2 9806    | 0.364633872 | 0.863531865  | 7.57709E-06 | 0.000407205 |
| TP53 1390313   | 0.647566898 | 0.938462444  | 7.60488E-06 | 0.000407205 |
| AEBP2 121536   | 1.342020468 | 1.047211669  | 7.75428E-06 | 0.000413801 |
| GHDC 84514     | 0.682449176 | 0.947597333  | 7.81028E-06 | 0.000413801 |
| SASH3 54440    | 0.327993688 | 0.84004355   | 7.80628E-06 | 0.000413801 |
| SPN 6693       | 0.405274704 | 0.857198238  | 7.78953E-06 | 0.000413801 |
| PEX14 5195     | 0.786231324 | 0.962844813  | 7.85706E-06 | 0.000415187 |
| BNIP1 149428   | 46.45736988 | 3.212140184  | 7.88458E-06 | 0.00041555  |
| PCBP1 5093     | 0.84297704  | 0.981416657  | 8.03273E-06 | 0.000422253 |
| AKR7A2 8574    | 0.713103794 | 0.954011719  | 8.17046E-06 | 0.000425192 |
| ARHGAP9 64333  | 0.336490552 | 0.827956892  | 8.20543E-06 | 0.000425192 |
| CSDAP1 440359  | 1.839755176 | 1.185222302  | 8.12065E-06 | 0.000425192 |
| DIO2 1734      | 4.835236414 | 1.354070797  | 8.17782E-06 | 0.000425192 |
| ID1 3397       | 3.68690514  | 1.260219971  | 8.20955E-06 | 0.000425192 |
| SRM 6723       | 0.685729589 | 0.955743617  | 8.21536E-06 | 0.000425192 |
| QSER1 79832    | 1.407455791 | 1.050857674  | 8.24297E-06 | 0.000425528 |
| CD3E 916       | 0.308715312 | 0.836783202  | 8.32467E-06 | 0.000427567 |
| FERMT3 83706   | 0.517064441 | 0.911841775  | 8.32496E-06 | 0.000427567 |
| NCF4 4689      | 0.49938998  | 0.883716442  | 8.43459E-06 | 0.000432096 |
| DOK3 79930     | 0.477357002 | 0.88207006   | 8.50809E-06 | 0.000432777 |
| FAM13A 10144   | 1.632796552 | 1.08509391   | 8.63352E-06 | 0.000432777 |
| GSTCD 79807    | 1.410758836 | 1.07010402   | 8.59557E-06 | 0.000432777 |
| HLA-DMB 3109   | 0.468139961 | 0.900366432  | 8.59967E-06 | 0.000432777 |
| KIAA1217 56243 | 2.068815841 | 1.123550993  | 8.57523E-06 | 0.000432777 |
| LST1 7940      | 0.501324886 | 0.878523281  | 8.58324E-06 | 0.000432777 |
| RPS6KA1 6195   | 0.632648533 | 0.937533275  | 8.58537E-06 | 0.000432777 |
| SNAI3 333929   | 0.425773922 | 0.778981864  | 8.64135E-06 | 0.000432777 |
| TRIAP1 51499   | 1.278318784 | 1.039785913  | 8.50832E-06 | 0.000432777 |
| DOCK5 80005    | 1.987540369 | 1.130998549  | 8.69256E-06 | 0.000434261 |
| IRF5 3663      | 0.525960647 | 0.893069916  | 8.77766E-06 | 0.000437427 |
| GRB7 2886      | 13.84916501 | 2.623491724  | 8.84196E-06 | 0.00043943  |
| PPL 5493       | 8.512909758 | 1.380317057  | 8.86151E-06 | 0.00043943  |
| ROBLD3 28956   | 0.635453149 | 0.937629482  | 8.92163E-06 | 0.000441325 |
| C4orf36 132989 | 1.874433439 | 1.839800447  | 9.01957E-06 | 0.00044446  |
| TM9SF3 56889   | 1.293988601 | 1.032727251  | 9.02917E-06 | 0.00044446  |
| NPR3 4883      | 7.029702151 | 3.023627465  | 9.18453E-06 | 0.000451005 |
| AADAT 51166    | 1.837441586 | 1.141104398  | 9.23451E-06 | 0.000452356 |



|                  |             |             |             |             |
|------------------|-------------|-------------|-------------|-------------|
| PPP2R2C 5522     | 15.31817306 | 1.964909621 | 9.42117E-06 | 0.00046038  |
| RASSF10 644943   | 5.053481153 | 2.159856709 | 9.46374E-06 | 0.00046134  |
| ST3GAL3 6487     | 0.733217993 | 0.949918388 | 9.49608E-06 | 0.000461798 |
| EIF4E 1977       | 1.294339294 | 1.043714878 | 9.54755E-06 | 0.000463183 |
| WDFY3 23001      | 1.381981048 | 1.049299322 | 9.57291E-06 | 0.000463297 |
| TMEM87A 25963    | 1.344089754 | 1.04061952  | 9.60504E-06 | 0.000463737 |
| SOX13 9580       | 0.651663515 | 0.946724611 | 9.63893E-06 | 0.00046426  |
| LGALS9 3965      | 0.489676436 | 0.906120635 | 9.67154E-06 | 0.000464719 |
| LAGE3 8270       | 0.660455949 | 0.938817884 | 9.71701E-06 | 0.000465792 |
| HCK 3055         | 0.518863688 | 0.898689544 | 9.81046E-06 | 0.000468899 |
| IL4I1 259307     | 0.356808175 | 0.842914554 | 9.82841E-06 | 0.000468899 |
| GIMAP5 55340     | 0.461162329 | 0.885196439 | 9.86544E-06 | 0.000469553 |
| CYB561D2 11068   | 0.731559522 | 0.951782288 | 9.90799E-06 | 0.000470466 |
| HMGCL 3155       | 0.776931896 | 0.963108823 | 9.98584E-06 | 0.000471936 |
| LIMCH1 22998     | 2.70341755  | 1.188353467 | 9.98334E-06 | 0.000471936 |
| FABP5 2171       | 4.589473624 | 1.279964569 | 1.00343E-05 | 0.000473115 |
| GSDMC 56169      | 32.45263533 | 3.893154172 | 1.00581E-05 | 0.000473129 |
| CHST12 55501     | 0.704480786 | 0.946175182 | 1.01911E-05 | 0.00047385  |
| GLTP 51228       | 2.232883112 | 1.117590321 | 1.01881E-05 | 0.00047385  |
| NUS1 116150      | 1.376350119 | 1.046988055 | 1.01289E-05 | 0.00047385  |
| TIMM17B 10245    | 0.717882344 | 0.951623316 | 1.01427E-05 | 0.00047385  |
| UBA7 7318        | 0.605285291 | 0.930021086 | 1.01646E-05 | 0.00047385  |
| ARRB2 409        | 0.587511731 | 0.924821739 | 1.024E-05   | 0.000473935 |
| PSMD7 5713       | 1.230140351 | 1.028551333 | 1.02281E-05 | 0.000473935 |
| ARL8A 127829     | 0.748839033 | 0.961472239 | 1.03087E-05 | 0.000474996 |
| CD3D 915         | 0.329905149 | 0.816715041 | 1.03347E-05 | 0.000474996 |
| SLC2A6 11182     | 0.384229588 | 0.845290361 | 1.03573E-05 | 0.000474996 |
| SPI1 6688        | 0.408249184 | 0.874030087 | 1.03477E-05 | 0.000474996 |
| PTPRK 5796       | 1.723075204 | 1.091211112 | 1.04133E-05 | 0.000476478 |
| ACVR2A 92        | 1.48271123  | 1.073634464 | 1.04526E-05 | 0.000477195 |
| CCNC 892         | 1.434657454 | 1.057255702 | 1.05403E-05 | 0.000480108 |
| NPRL2 10641      | 0.785032713 | 0.960505524 | 1.06091E-05 | 0.000482152 |
| STRAP 11171      | 1.298218547 | 1.034064032 | 1.06702E-05 | 0.000483837 |
| LOC606724 606724 | 0.351022118 | 0.776438032 | 1.0777E-05  | 0.000487579 |
| PGM3 5238        | 1.498203836 | 1.072494097 | 1.08269E-05 | 0.000487646 |
| SIGLEC10 89790   | 0.410214638 | 0.848057921 | 1.08146E-05 | 0.000487646 |
| GTF2H3 2967      | 1.396502997 | 1.06492936  | 1.09008E-05 | 0.000489881 |
| MACF1 23499      | 1.328712145 | 1.034244875 | 1.10102E-05 | 0.000493524 |
| SYT8 90019       | 21.10041358 | 17.3068893  | 1.10309E-05 | 0.000493524 |
| PTPRF 5792       | 1.974781272 | 1.093508331 | 1.10897E-05 | 0.000495051 |
| SLC38A4 55089    | 3.817947944 | 3.436330958 | 1.11742E-05 | 0.000497723 |
| ZBTB17 7709      | 0.77820804  | 0.962253498 | 1.12034E-05 | 0.000497922 |
| CCDC6 8030       | 1.301186802 | 1.039764658 | 1.12621E-05 | 0.000498367 |
| LRRC25 126364    | 0.417644494 | 0.85244187  | 1.12696E-05 | 0.000498367 |
| MPZL2 10205      | 4.271644871 | 1.294043916 | 1.12877E-05 | 0.000498367 |
| SH2D4A 63898     | 2.138668119 | 1.157141855 | 1.13198E-05 | 0.000498689 |
| ITGB2 3689       | 0.395606368 | 0.890146985 | 1.13567E-05 | 0.000499222 |
| EHF 26298        | 11.03805435 | 1.816628718 | 1.14917E-05 | 0.000499702 |
| IL21R 50615      | 0.370980305 | 0.824007904 | 1.14763E-05 | 0.000499702 |
| KCNJ15 3772      | 3.647762306 | 1.437981034 | 1.1426E-05  | 0.000499702 |
| PLEK 5341        | 0.447501714 | 0.885236615 | 1.14514E-05 | 0.000499702 |
| PSMB4 5692       | 0.757458526 | 0.969880541 | 1.14597E-05 | 0.000499702 |

|                 |             |              |             |             |
|-----------------|-------------|--------------|-------------|-------------|
| ABHD12 26090    | 0.69463641  | 0.954424429  | 1.1567E-05  | 0.00049974  |
| ATP13A2 23400   | 0.676333028 | 0.951463475  | 1.15519E-05 | 0.00049974  |
| C7orf59 389541  | 0.712549073 | 0.956312845  | 1.15211E-05 | 0.00049974  |
| ANO6 196527     | 1.382616045 | 1.045349006  | 1.15957E-05 | 0.000499905 |
| BCL2L12 83596   | 0.732174037 | 0.949900525  | 1.1767E-05  | 0.000506209 |
| C1orf161 126868 | 12.57656057 | -9.355139414 | 1.18354E-05 | 0.000506411 |
| GIMAP1 170575   | 0.482202954 | 0.863338499  | 1.18561E-05 | 0.000506411 |
| SSR4 6748       | 0.644262723 | 0.949178667  | 1.18425E-05 | 0.000506411 |
| USF2 7392       | 0.714308853 | 0.960234428  | 1.18723E-05 | 0.000506411 |
| HOOK3 84376     | 1.362960226 | 1.045290065  | 1.19473E-05 | 0.000508531 |
| FBXO45 200933   | 1.385728895 | 1.054216521  | 1.21291E-05 | 0.000513138 |
| GJB3 2707       | 29.65696442 | 2.462145174  | 1.2132E-05  | 0.000513138 |
| MAPKAP5 8550    | 1.216777699 | 1.03258913   | 1.21076E-05 | 0.000513138 |
| SLC47A2 146802  | 20.81414128 | -255.1543409 | 1.21991E-05 | 0.000514892 |
| AP1M1 8907      | 0.749100897 | 0.963574664  | 1.24526E-05 | 0.000523399 |
| CCDC25 55246    | 1.331493634 | 1.04306674   | 1.24512E-05 | 0.000523399 |
| MESP1 55897     | 0.536058477 | 0.842669843  | 1.25073E-05 | 0.000524603 |
| ICAM2 3384      | 0.466093205 | 0.872829058  | 1.2591E-05  | 0.000525239 |
| NIPAL2 79815    | 1.685947198 | 1.111700394  | 1.2551E-05  | 0.000525239 |
| NR1H2 7376      | 0.710446055 | 0.956765247  | 1.26007E-05 | 0.000525239 |
| CD68 968        | 0.468652325 | 0.916839046  | 1.26997E-05 | 0.00052827  |
| ABCE1 6059      | 1.347230956 | 1.040742399  | 1.28253E-05 | 0.000529773 |
| DSC1 1823       | 88.87792481 | 3.874447874  | 1.28674E-05 | 0.000529773 |
| FABP5L3 220832  | 3.155730483 | -10.74994951 | 1.27936E-05 | 0.000529773 |
| NEDD4 4734      | 1.828551673 | 1.109006609  | 1.28626E-05 | 0.000529773 |
| SENP6 26054     | 1.369447295 | 1.045785178  | 1.2804E-05  | 0.000529773 |
| MEF2D 4209      | 0.705987459 | 0.956595981  | 1.29485E-05 | 0.000532025 |
| MYO9B 4650      | 0.692745736 | 0.958124182  | 1.30498E-05 | 0.000532499 |
| RWDD4A 201965   | 1.332508569 | 1.048765664  | 1.30658E-05 | 0.000532499 |
| STRN3 29966     | 1.328141152 | 1.046853073  | 1.30234E-05 | 0.000532499 |
| TNFAIP8L2 79626 | 0.460839523 | 0.851569127  | 1.30087E-05 | 0.000532499 |
| TESK1 7016      | 0.688142874 | 0.946833077  | 1.32222E-05 | 0.000537782 |
| RBM3 5935       | 1.314277794 | 1.032244581  | 1.32895E-05 | 0.00053943  |
| ESYT3 83850     | 5.777701144 | 1.823588299  | 1.33709E-05 | 0.000541238 |
| SMAP1 60682     | 1.28451039  | 1.04002024   | 1.33878E-05 | 0.000541238 |
| NAGPA 51172     | 0.722494327 | 0.949506694  | 1.34242E-05 | 0.000541623 |
| ABCA12 26154    | 85.648112   | 4.621526778  | 1.35092E-05 | 0.000542877 |
| TMEM45A 55076   | 5.702114246 | 1.302257026  | 1.34845E-05 | 0.000542877 |
| SYTL3 94120     | 0.50257933  | 0.86235595   | 1.36297E-05 | 0.000546628 |
| ACVR1 90        | 1.40933324  | 1.051406291  | 1.3717E-05  | 0.000547415 |
| ERGIC2 51290    | 1.361238673 | 1.049165185  | 1.37309E-05 | 0.000547415 |
| PITPNB 23760    | 1.273520427 | 1.033370623  | 1.37268E-05 | 0.000547415 |
| DSC2 1824       | 21.10447651 | 1.759147888  | 1.38959E-05 | 0.000552083 |
| FGR 2268        | 0.394906806 | 0.84405133   | 1.39028E-05 | 0.000552083 |
| RUFY1 80230     | 0.799752945 | 0.968261152  | 1.40204E-05 | 0.000554564 |
| TRPV3 162514    | 4.236446607 | 1.753700309  | 1.4004E-05  | 0.000554564 |
| RFXANK 8625     | 0.70340601  | 0.951417495  | 1.40502E-05 | 0.000554654 |
| TNFRSF1B 7133   | 0.497349955 | 0.908120977  | 1.42003E-05 | 0.000559482 |
| CYTH4 27128     | 0.470859777 | 0.885847088  | 1.43395E-05 | 0.000561666 |
| PPP1R13L 10848  | 3.991904575 | 1.280067052  | 1.43319E-05 | 0.000561666 |
| SLC39A9 55334   | 1.24453238  | 1.029490367  | 1.4316E-05  | 0.000561666 |
| TLE6 79816      | 0.4226284   | 0.778934242  | 1.43818E-05 | 0.000562229 |

|                  |             |             |             |             |
|------------------|-------------|-------------|-------------|-------------|
| PNPLA1 285848    | 26.34053832 | 36.02649145 | 1.44513E-05 | 0.000563854 |
| IL27 246778      | 0.3463197   | 0.459291392 | 1.46974E-05 | 0.000572345 |
| C17orf65 339201  | 0.774061678 | 0.950981281 | 1.48669E-05 | 0.000577828 |
| SAPS1 22870      | 0.68161105  | 0.954986816 | 1.51401E-05 | 0.000587314 |
| FCN1 2219        | 0.336312017 | 0.799186848 | 1.52395E-05 | 0.000588901 |
| MPZL3 196264     | 2.925380672 | 1.579123803 | 1.52173E-05 | 0.000588901 |
| TEX264 51368     | 0.709225715 | 0.955468762 | 1.52783E-05 | 0.000589267 |
| CTSZ 1522        | 0.582324858 | 0.944355122 | 1.53673E-05 | 0.000591566 |
| HLA-F 3134       | 0.530204325 | 0.922962205 | 1.55725E-05 | 0.000597182 |
| RHOV 171177      | 20.96885659 | 2.166230146 | 1.55491E-05 | 0.000597182 |
| C1orf116 79098   | 7.856974025 | 1.537963499 | 1.56398E-05 | 0.000598623 |
| RBM42 79171      | 0.719006735 | 0.958035088 | 1.57257E-05 | 0.000600731 |
| RCOR1 23186      | 1.302600231 | 1.040581945 | 1.57545E-05 | 0.000600731 |
| CTSS 1520        | 0.511174347 | 0.91730883  | 1.57927E-05 | 0.000601048 |
| NDUFS7 374291    | 0.584249419 | 0.930658992 | 1.58554E-05 | 0.000601162 |
| PAQR5 54852      | 2.54665648  | 1.225046794 | 1.58304E-05 | 0.000601162 |
| C20orf27 54976   | 0.646143065 | 0.9421513   | 1.59553E-05 | 0.000602041 |
| HSH2D 84941      | 0.286196771 | 0.763341152 | 1.59683E-05 | 0.000602041 |
| PVRL1 5818       | 3.586834402 | 1.199997506 | 1.5915E-05  | 0.000602041 |
| SNX16 64089      | 1.405339473 | 1.068534386 | 1.60327E-05 | 0.00060334  |
| EXT1 2131        | 1.298975892 | 1.038518837 | 1.62077E-05 | 0.000605013 |
| FZD6 8323        | 1.699308219 | 1.081651349 | 1.62575E-05 | 0.000605013 |
| IBTK 25998       | 1.379755779 | 1.048300651 | 1.61126E-05 | 0.000605013 |
| SERPINB13 5275   | 224.1286072 | 12.71229129 | 1.61618E-05 | 0.000605013 |
| SSFA2 6744       | 1.716264069 | 1.069175025 | 1.6257E-05  | 0.000605013 |
| TMEM180 79847    | 0.666608491 | 0.923243671 | 1.61791E-05 | 0.000605013 |
| CYP27A1 1593     | 0.62737415  | 0.947117535 | 1.63877E-05 | 0.000607613 |
| UBASH3A 53347    | 0.318741364 | 0.759113023 | 1.63754E-05 | 0.000607613 |
| DLG5 9231        | 1.557693397 | 1.068473331 | 1.65808E-05 | 0.000613642 |
| RASAL3 64926     | 0.365169348 | 0.839630963 | 1.67904E-05 | 0.00062026  |
| BRMS1L 84312     | 1.332867985 | 1.057163058 | 1.69637E-05 | 0.000625514 |
| MFNG 4242        | 0.436498736 | 0.862108485 | 1.70074E-05 | 0.000625978 |
| CD37 951         | 0.250570806 | 0.812243705 | 1.70982E-05 | 0.00062817  |
| PCYT2 5833       | 0.542898765 | 0.916711274 | 1.72022E-05 | 0.000628551 |
| USP38 84640      | 1.329186681 | 1.0456582   | 1.71917E-05 | 0.000628551 |
| UXT 8409         | 0.755279262 | 0.960854923 | 1.71719E-05 | 0.000628551 |
| AES 166          | 0.70750106  | 0.961858956 | 1.74694E-05 | 0.000634725 |
| BTBD7 55727      | 1.284983397 | 1.039820351 | 1.74413E-05 | 0.000634725 |
| COMMD4 54939     | 0.699970748 | 0.953901887 | 1.74848E-05 | 0.000634725 |
| MPP1 4354        | 0.694991099 | 0.947041431 | 1.74973E-05 | 0.000634725 |
| TPRG1 285386     | 6.236696254 | 1.900770455 | 1.7561E-05  | 0.000635892 |
| MYO1F 4542       | 0.444321431 | 0.881414942 | 1.76233E-05 | 0.000637001 |
| ALG10B 144245    | 1.491319386 | 1.075255263 | 1.77795E-05 | 0.000640348 |
| GOPC 57120       | 1.335643737 | 1.044925891 | 1.77742E-05 | 0.000640348 |
| LOC642587 642587 | 110.8905081 | 19.24560456 | 1.78823E-05 | 0.000641753 |
| SGMS2 166929     | 1.832918042 | 1.130445627 | 1.78514E-05 | 0.000641753 |
| RAB8A 4218       | 0.796441201 | 0.969716479 | 1.79616E-05 | 0.000643454 |
| CRABP2 1382      | 8.114636176 | 1.37228332  | 1.80319E-05 | 0.000644702 |
| FKBP11 51303     | 0.611119319 | 0.935436485 | 1.80605E-05 | 0.000644702 |
| C16orf72 29035   | 1.263621222 | 1.034923185 | 1.81151E-05 | 0.000645506 |
| CYTIP 9595       | 0.358905891 | 0.830610241 | 1.82996E-05 | 0.00065093  |
| BPTF 2186        | 1.347523483 | 1.040873926 | 1.84173E-05 | 0.000653962 |

|                 |             |              |             |             |
|-----------------|-------------|--------------|-------------|-------------|
| C6orf108 10591  | 0.684471011 | 0.94542293   | 1.86329E-05 | 0.000654391 |
| FAM113B 91523   | 0.422371296 | 0.851246445  | 1.86351E-05 | 0.000654391 |
| GPX4 2879       | 0.653603786 | 0.949706584  | 1.84797E-05 | 0.000654391 |
| IL1RL2 8808     | 4.062000407 | 2.671164638  | 1.8657E-05  | 0.000654391 |
| PPOX 5498       | 0.754826681 | 0.953981     | 1.86409E-05 | 0.000654391 |
| SHKBP1 92799    | 0.69865105  | 0.953415009  | 1.85107E-05 | 0.000654391 |
| TMEM167A 153339 | 1.328596923 | 1.038693075  | 1.85561E-05 | 0.000654391 |
| PIK3R5 23533    | 0.46790168  | 0.871593208  | 1.87397E-05 | 0.000656151 |
| NDRG4 65009     | 2.949931167 | 1.225242131  | 1.8785E-05  | 0.000656594 |
| DOK2 9046       | 0.42454878  | 0.860728736  | 1.88507E-05 | 0.000657751 |
| ARRDC2 27106    | 0.680123401 | 0.941236213  | 1.90088E-05 | 0.000662119 |
| CD38 952        | 0.356886624 | 0.816216803  | 1.91701E-05 | 0.000666585 |
| DPM3 54344      | 0.568848907 | 0.913435684  | 1.92167E-05 | 0.000667052 |
| RAET1L 154064   | 65.84744739 | -1.301149931 | 1.93358E-05 | 0.00067003  |
| LCTL 197021     | 3.487862118 | 1.450634498  | 1.94384E-05 | 0.000672429 |
| CD4 920         | 0.477405512 | 0.906402635  | 1.95293E-05 | 0.000674343 |
| RSPRY1 89970    | 1.406370178 | 1.061491611  | 1.95607E-05 | 0.000674343 |
| CD86 942        | 0.53043126  | 0.892036176  | 1.96345E-05 | 0.000675729 |
| HEXIM2 124790   | 0.657893863 | 0.927939507  | 1.97049E-05 | 0.000675742 |
| LIPG 9388       | 3.075366595 | 1.311794808  | 1.96941E-05 | 0.000675742 |
| TMEM140 55281   | 0.657788049 | 0.942611801  | 1.97356E-05 | 0.000675742 |
| C1orf200 644997 | 0.335366214 | 0.237827707  | 1.9788E-05  | 0.000676387 |
| CCL3 6348       | 0.428356493 | 0.855108593  | 1.99782E-05 | 0.000676992 |
| CD74 972        | 0.454570318 | 0.931146196  | 2.00075E-05 | 0.000676992 |
| CYBA 1535       | 0.525935587 | 0.921783841  | 1.99335E-05 | 0.000676992 |
| PGBD3 267004    | 1.31957469  | 1.071416025  | 1.99056E-05 | 0.000676992 |
| RNAS22 8635     | 0.614261978 | 0.930856547  | 1.99456E-05 | 0.000676992 |
| TARP 445347     | 0.390386602 | 0.722069902  | 1.98578E-05 | 0.000676992 |
| TMEM120A 83862  | 0.611359586 | 0.933356169  | 2.00436E-05 | 0.000677078 |
| GN5 2787        | 0.748717245 | 0.963327305  | 2.00866E-05 | 0.000677393 |
| CD2 914         | 0.367028307 | 0.848975351  | 2.01263E-05 | 0.000677596 |
| ARHGAP30 257106 | 0.427615372 | 0.880729065  | 2.03227E-05 | 0.000683067 |
| TMEM101 84336   | 0.780186455 | 0.964985694  | 2.03613E-05 | 0.000683223 |

**Figure 3A**

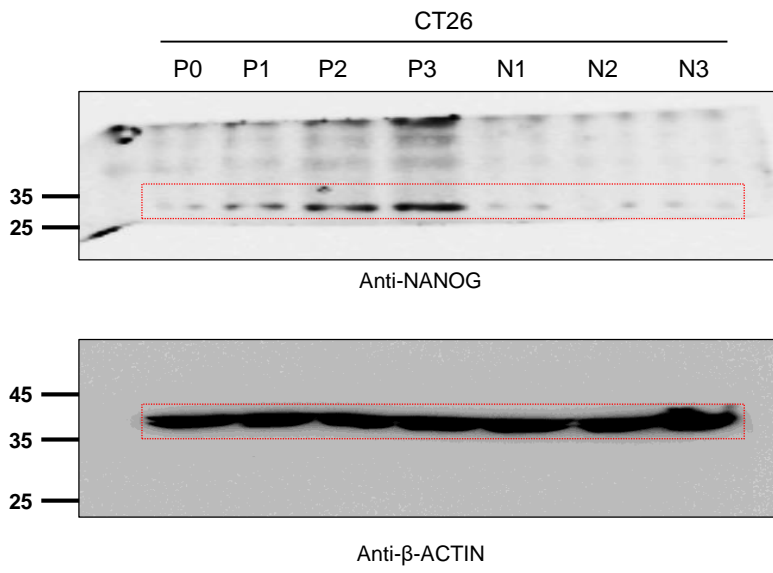

**Figure 4D**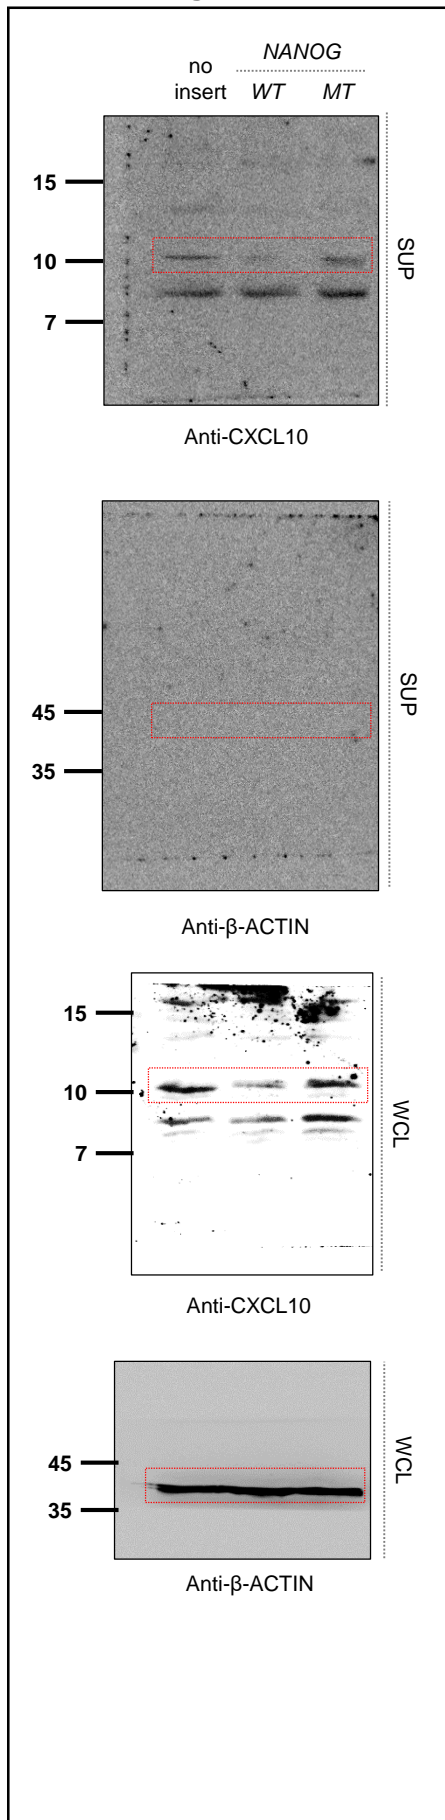**Figure 4E**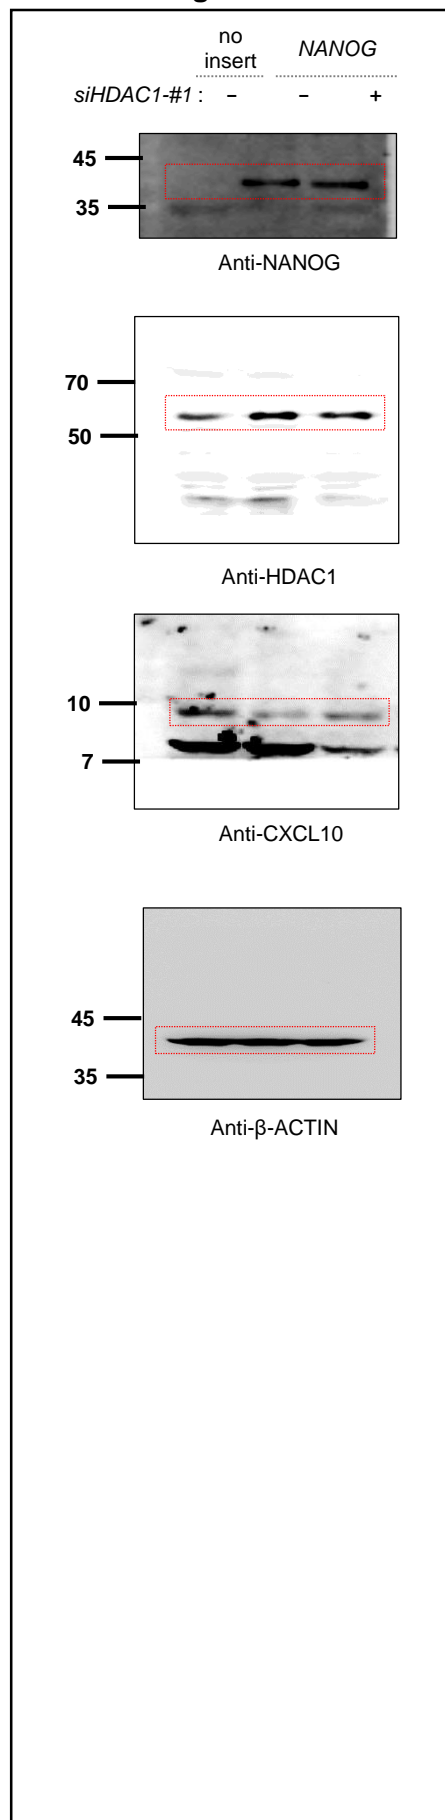**Figure 4I**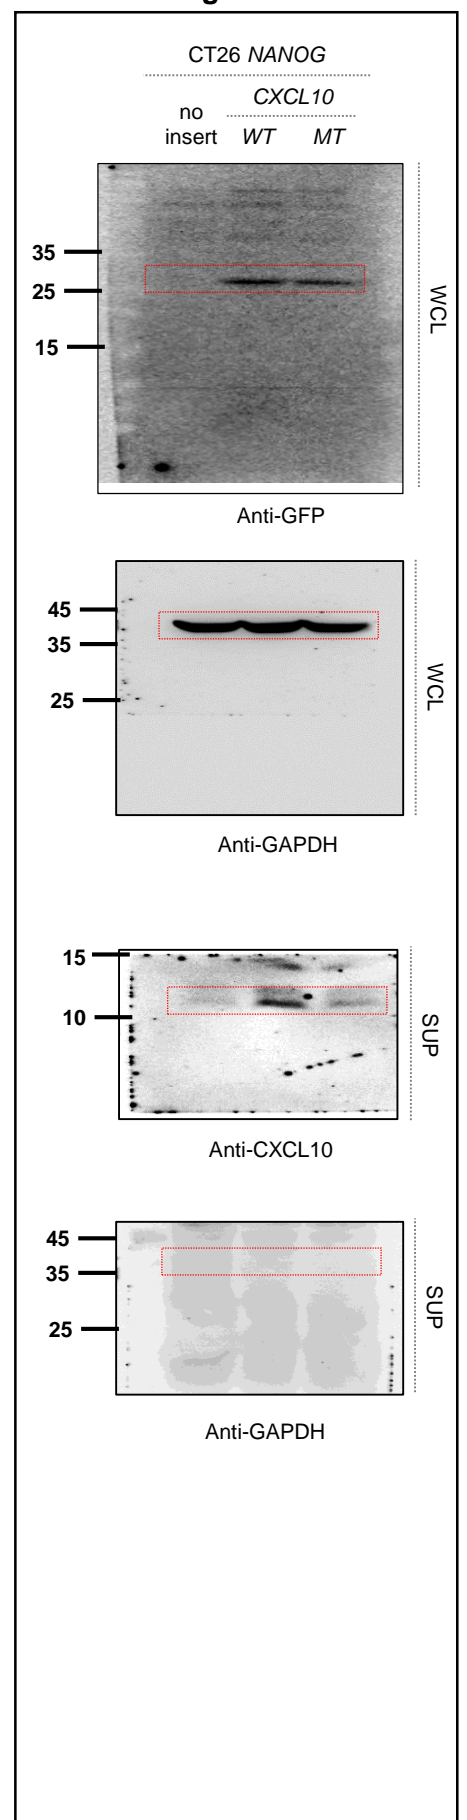

**Figure 5A**

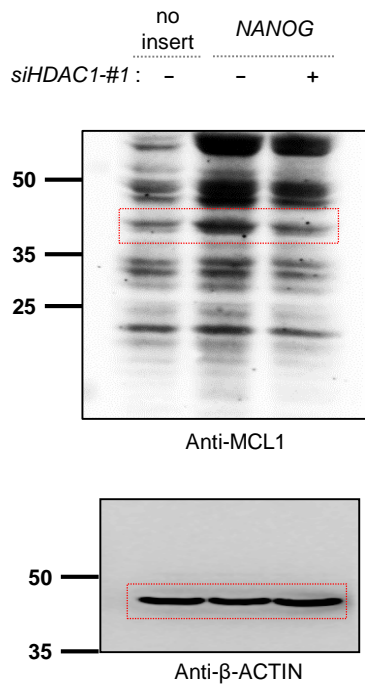

**Figure 5C**

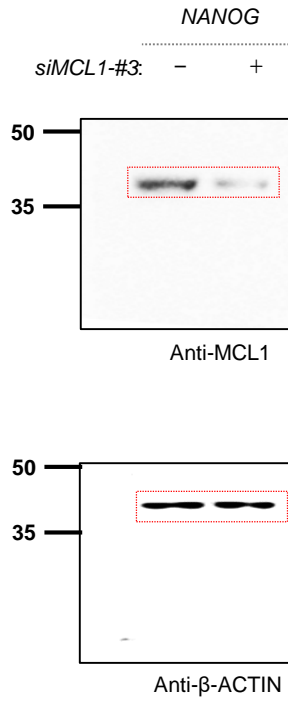

Figure 6A

**B16 F10**  
*siNANOG*-#1: - + -  
*siHDAC1*-#1: - - +

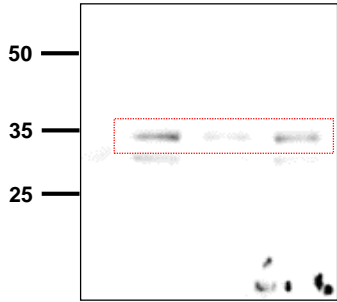

Anti-NANOG

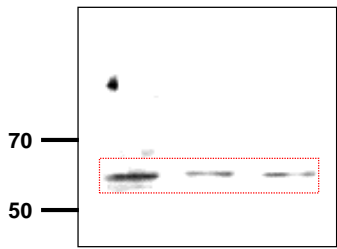

Anti-HDAC1

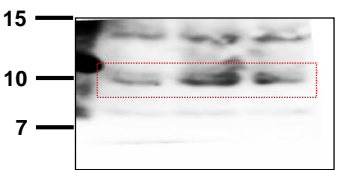

Anti-CXCL10

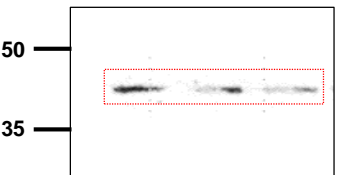

Anti-MCL1

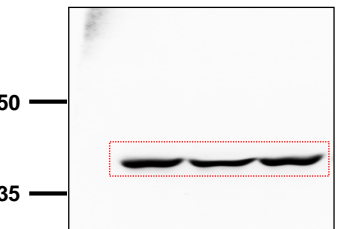

Anti- $\beta$ -ACTIN

**CT26 P3**  
- + -  
- - +

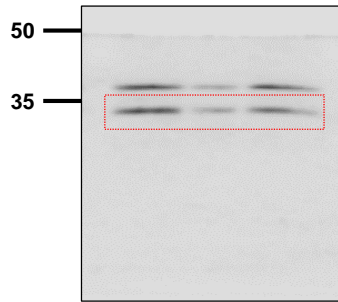

Anti-NANOG

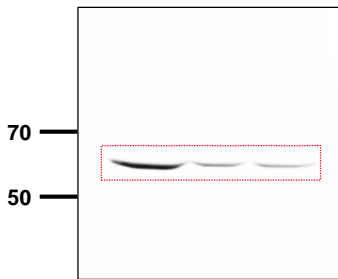

Anti-HDAC1

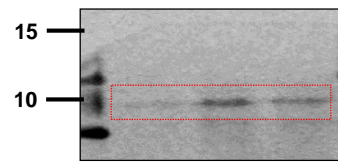

Anti-CXCL10

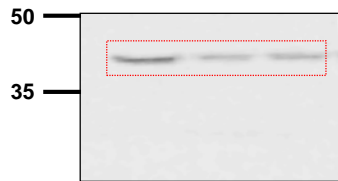

Anti-MCL1

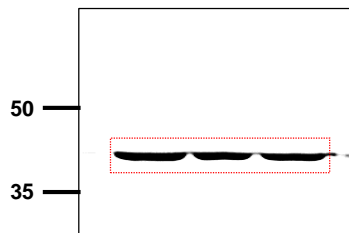

Anti- $\beta$ -ACTIN

**526mel**  
- + -  
- - +

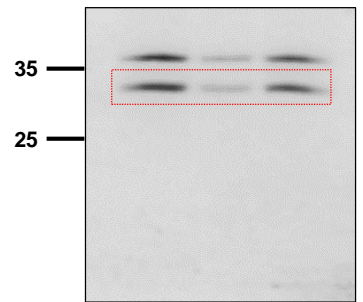

Anti-NANOG

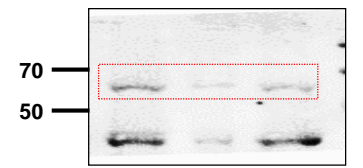

Anti-HDAC1

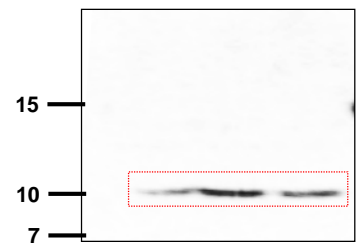

Anti-CXCL10

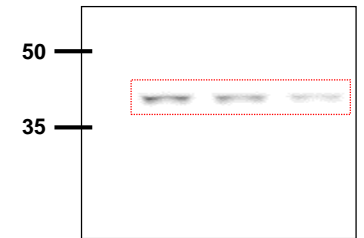

Anti-MCL1

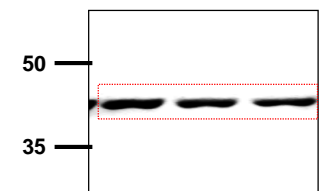

Anti- $\beta$ -ACTIN



**Figure 6A**

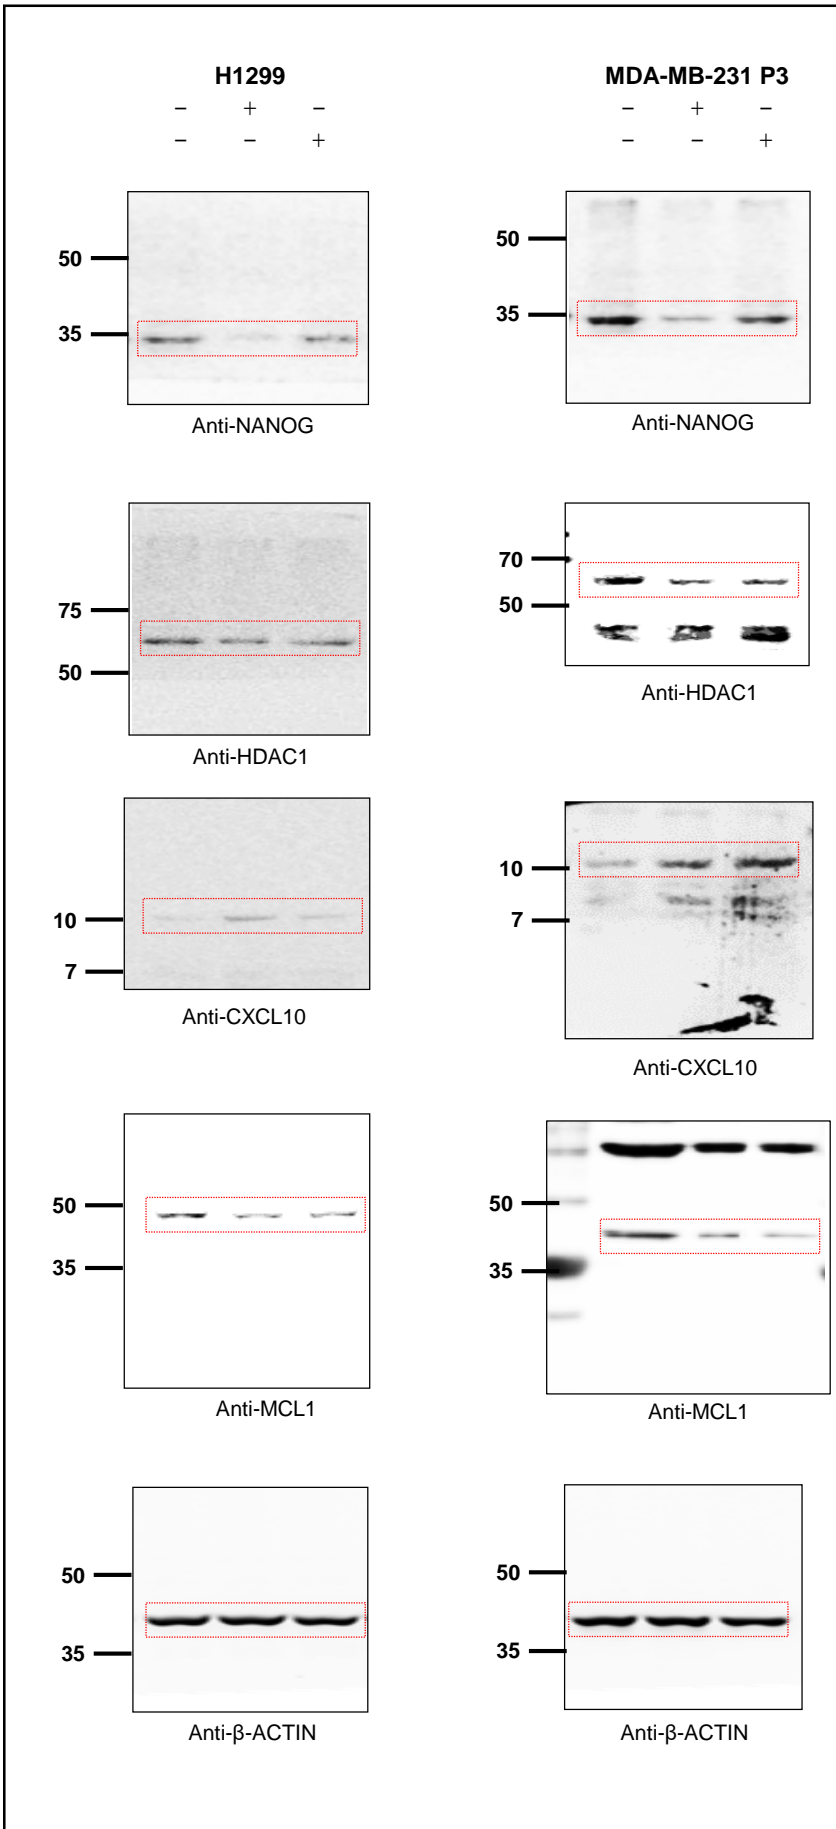

**Figure 7B**

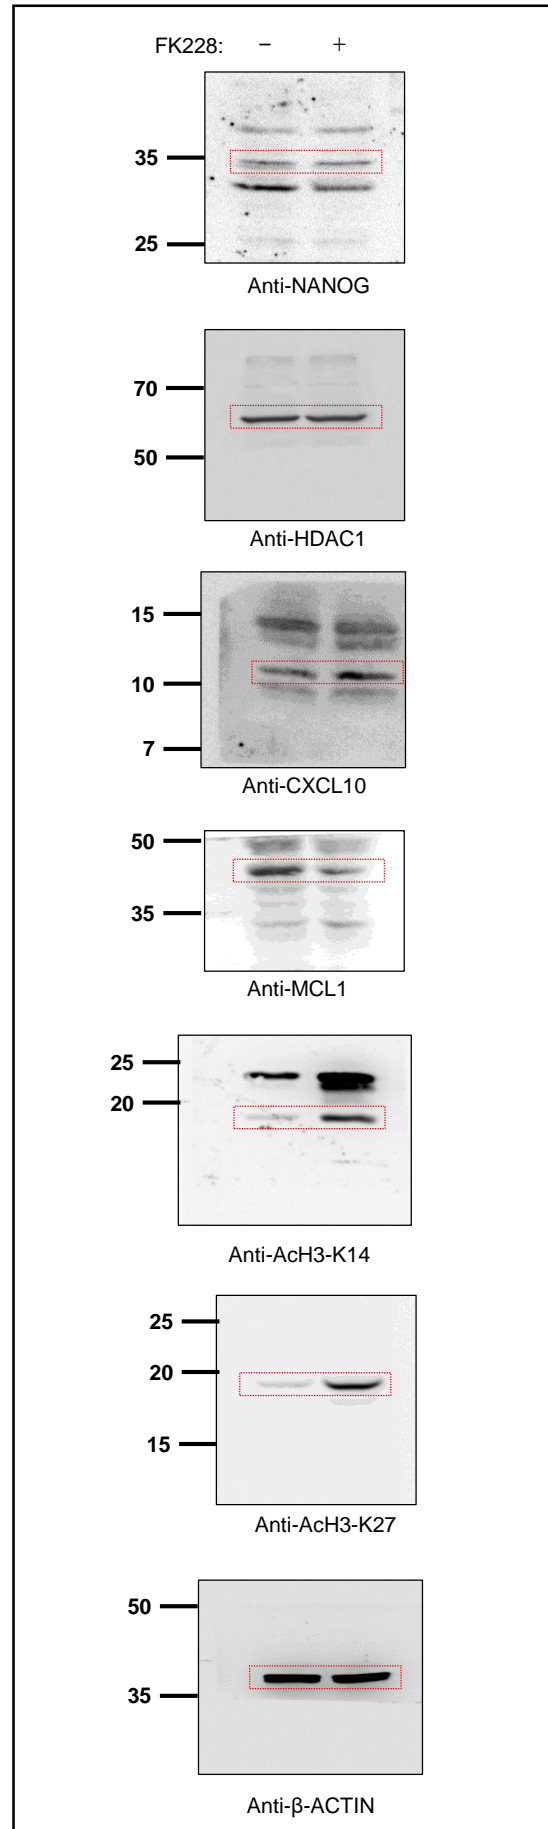

**Supplemental Fig 8**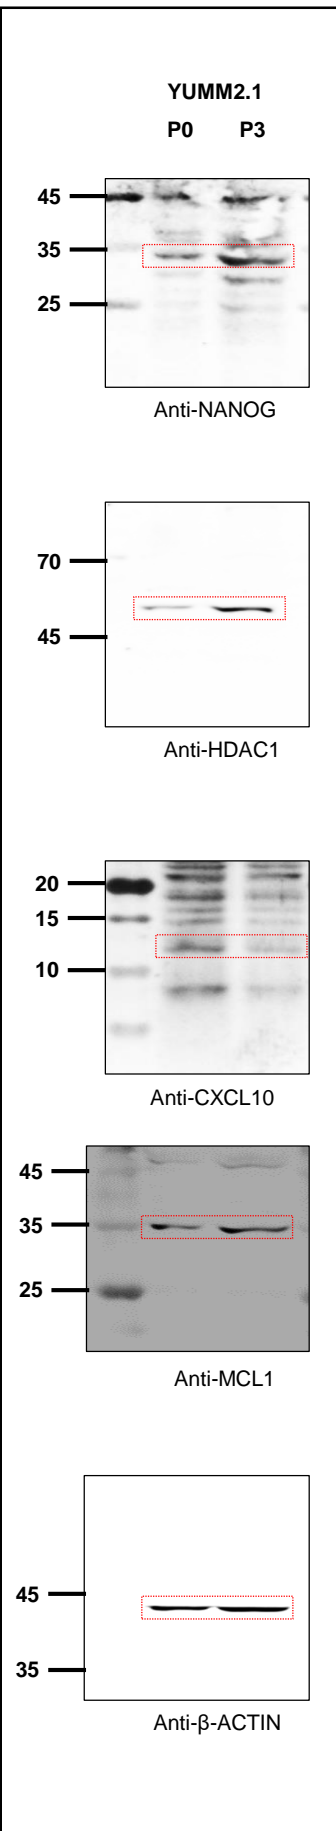**Supplemental Fig 9**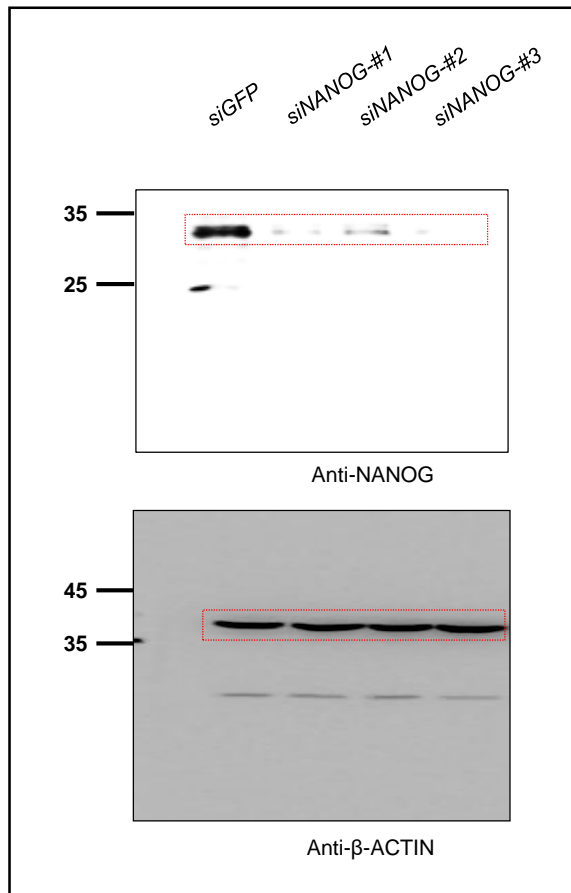**Supplemental Fig 11A**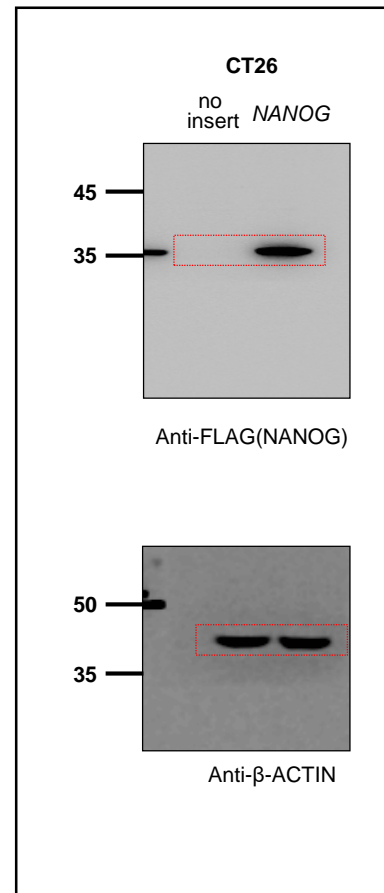**Supplemental Fig 12**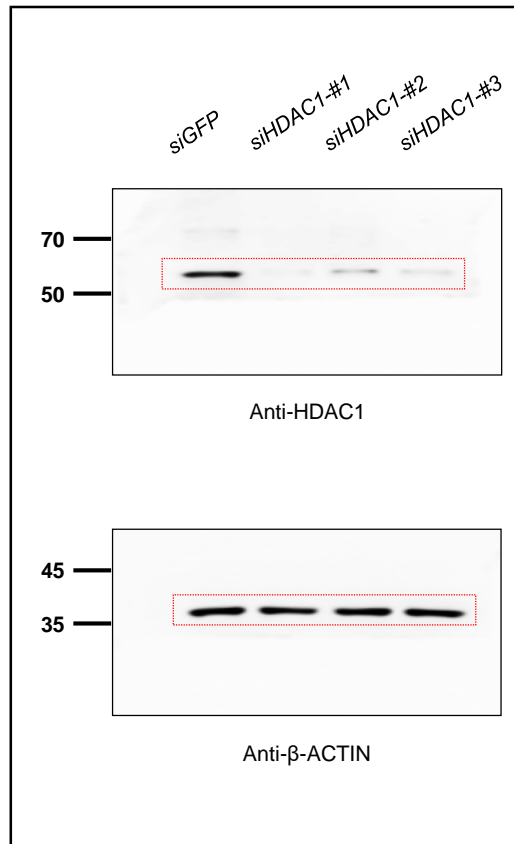**Supplemental Fig 13**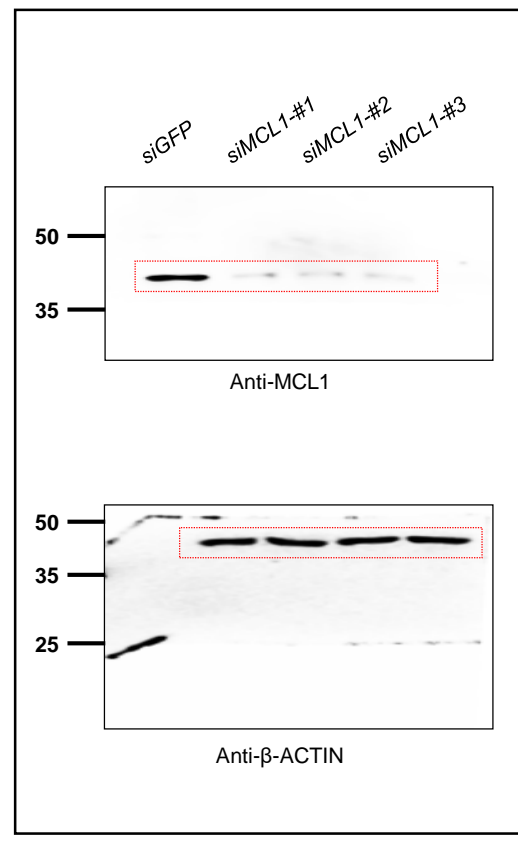

Supplemental Fig 15

YUMM2.1 P3  
*siNANOG*-#1: - + -  
*siHDAC1*-#1: - - +

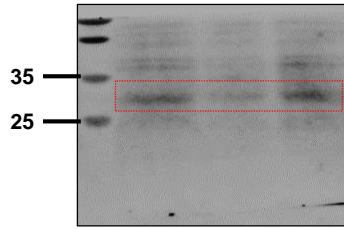

Anti-NANOG

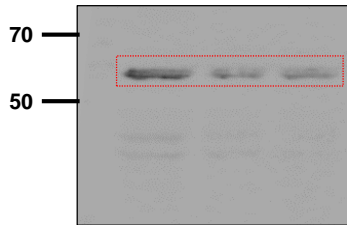

Anti-HDAC1

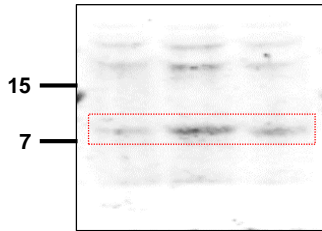

Anti-CXCL10

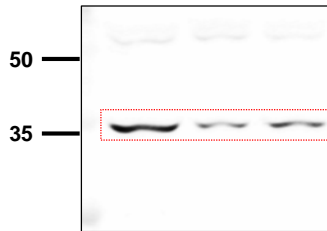

Anti-MCL1

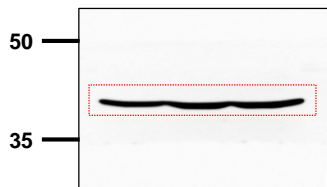

Anti- $\beta$ -ACTIN

Supplemental Fig 16

YUMM2.1 P3  
DMSO FK228

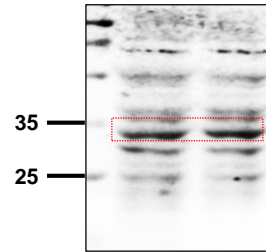

Anti-NANOG

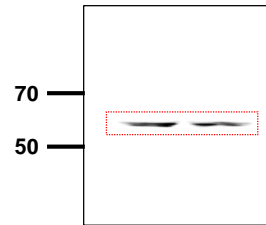

Anti-HDAC1

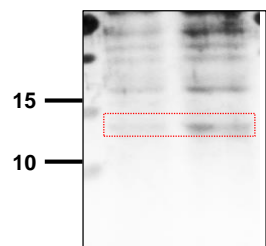

Anti-CXCL10

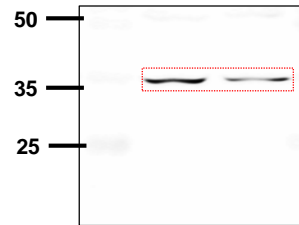

Anti-MCL1

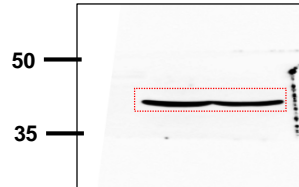

Anti- $\beta$ -ACTIN
